# Supplementary material for: Characterization of biogenic volatile organic compounds and their oxidation products at a stressed pine forest close to a biogas power plant
Source: Copernicus journal article supplement (doi:10.5194/egusphere-2024-1768), 2024-07-01
Supplement: Supplementary file 1 [file egusphere-2024-1768-supplement.pdf]

# 1 Supplement

## 2 S1. Data processing of CHARON-PTR-ToF-MS

3 The raw data files of CHARON-PTR-ToF-MS were processed by the Ionicon Data Analyzer  
4 (IDA 1.0.2, Ionicon Analytik). Mass calibrations were performed using four ion peaks including  
5  $\text{H}_3\text{O}^+$  ( $m/z$ 21.022),  $\text{C}_3\text{H}_6\text{OH}^+$  ( $m/z$ 59.049),  $\text{C}_6\text{H}_5\text{I}^+$  ( $m/z$ 203.943) and  $\text{C}_6\text{H}_5\text{I}_2^+$  ( $m/z$  330.848),  
6 where  $\text{C}_6\text{H}_5\text{I}^+$  and  $\text{C}_6\text{H}_5\text{I}_2^+$  were produced from the internal standard diiodobenzene (Ionicon  
7 Analytik). High-resolution peak fitting for each ion was performed automatically by the IDA  
8 software and refined manually according to the PTR-ToF-MS literature (Pagonis et al., 2019;  
9 Yáñez-Serrano et al., 2021). The quantification procedure of CHARON-PTR-ToF-MS data has  
10 been described in detail by (Müller et al., 2017; Leglise et al., 2019). The collision rate ( $k$ ) between  
11 the analyte molecules and PTR reagent ions ( $\text{H}_3\text{O}^+$ ) is calculated based on the parametrization  
12 method (Su and Chesnavich, 1982; Gioumousis and Stevenson, 1958; Bosque and Sales, 2002).  
13 This method uses the properties of the analyte molecule as input parameters: (i) its molecular  
14 weight, (ii) its molecular polarizability which is calculated from the elemental composition using  
15 the parametrization method and (iii) its dipole moment which is assumed to be 0.3 and 2.75 D for  
16 pure and substituted hydrocarbons, respectively. Assuming no interference of fragmentation, the  
17 maximum uncertainty of this quantification method is  $\pm 40\%$ . The separation of gas and particle  
18 measurement data as well as particle background subtractions were performed with the custom-in  
19 MATLAB script in IDA. Since the PTR-MS shows slow responses to some organic species  
20 especially oxidized species in the particle phase (Piel et al., 2021), the initial 290 s particle-phase  
21 data at each CHARON measurement mode were excluded. We also excluded the last 10 s particle-  
22 phase data at each CHARON measurement mode to avoid any interference from the switching  
23 between different measurement modes. Then the rest of 5 min (300 s) particle data were corrected  
24 by the interpolate subtraction of HEPA filter background. An average enrichment factor of  $\sim 6$  was  
25 used for calculating the mass concentrations of particles measured by the CHARON based on the  
26 CHARON calibration with ammonium nitrate particles (**Fig. S3**) and the ambient measurements  
27 of particle size distribution by the NanoScan SMPS (**Fig. S7**). For the gas phase data, we also  
28 excluded the initial 290 s and the last 10 s data at each VOC measurement mode, which could  
29 minimize the effect of fluctuated drift tube temperature on instrumental sensitivities during first  
30 measurement stage (**Fig. S2a**). Then the rest of 5 min (300 s) gas data were corrected by the

31 background subtraction from the measurement of VOC-free synthetic air. Finally, we averaged the  
32 background-corrected data in gas and particle phases into 5 min presented in this study.

33 It is well-known that the PTR-MS suffers the ionic fragmentation during the protonation  
34 processes (Yuan et al., 2017). According to gas calibrations, the residual fractions were  
35 characterized on average  $\sim 35\% \pm 2\%$  and  $\sim 37\% \pm 2\%$  for protonated isoprene ( $C_5H_9^+$ ,  $m/z69.07$ )  
36 and monoterpenes ( $C_{10}H_{17}^+$ ,  $m/z137.13$ ) respectively after their fragmentation within the  
37 CHARON-PTR-ToF-MS. A previous study has found that the fragmentation of 2-methyl-3-buten-  
38 2-ol (MBO,  $C_5H_{11}O^+$ ) emitted from biogenic sources inside PTR instruments had interferences on  
39 the quantification of isoprene based on the  $C_5H_9^+$  signals (Karl et al., 2012). As shown in **Fig. S15**,  
40 the concentrations of  $C_5H_9^+$  were much higher those of  $C_5H_{11}O^+$  in both CHARON-PTR-ToF-MS  
41 and Vocus-PTR-ToF-MS, and both ions correlated fairly and poorly with each other ( $r= 0.54$  and  
42  $0.09$ ). It indicates that the fragmentation of MBO have no significant influence on the attribution  
43 of  $C_5H_9^+$  to isoprene in this study. Recent studies have found that PTR-measured  $C_5H_9^+$  signals can  
44 be significantly contributed by the fragmentation of cycloalkanes and long-chain aldehydes (e.g.,  
45 octanal and nonanal) emitted from anthropogenic sources such as fossil fuel use and cooking in  
46 urban regions (Coggon et al., 2023; Pfannerstill et al., 2023). In this study, the concentrations of  
47 cycloalkanes and long-chain aldehydes such as octanal ( $C_8H_{17}O^+$ ) and nonanal ( $C_9H_{19}O^+$ ) were two  
48 orders of magnitude lower than that of  $C_5H_9^+$ , thus their interferences were also negligible in this  
49 study. Finally, we scaled the measured data of  $C_5H_9^+$  and  $C_{10}H_{17}^+$  by a factor of 2.86 and 2.70  
50 respectively to quantify the concentrations of isoprene and monoterpenes in this study. For other  
51 calibrated species including benzene, toluene, xylenes, trimethylbenzene, methanol and acetone,  
52 they have minor fragmentation in CHARON-PTR-ToF-MS. Besides, no fragmentation correction  
53 was made for uncalibrated VOC species.

54

## 55 **S2. Comparisons of VOCs between CHARON-PTR-ToF-MS and Vocus-PTR-ToF-MS**

56 We first compared the calibrated VOC species measured by the PTR-MS instruments during the  
57 entire measurement campaign. As shown in **Fig. S12**, good agreements were observed for  $C_6H_7^+$   
58 (benzene),  $C_7H_9^+$  (toluene),  $C_8H_{11}^+$  ( $C_8$ -aromatics) and  $C_9H_{13}^+$  ( $C_9$ -aromatics) between CHARON-  
59 PTR-MS and Vocus-PTR-MS within the differences of 10-30%. It should be noted that  $C_5H_9^+$   
60 (isoprene) and  $C_{10}H_{17}^+$  (monoterpenes) were fragmented differently inside CHARON-PTR-ToF-

61 MS and Vocus-PTR-ToF-MS. To take account into fragmentation corrections, we scaled the  
62 signals of  $C_5H_9^+$  and  $C_{10}H_{17}^+$  measured by the CHARON-PTR-ToF-MS with a factor of 2.86 and  
63 2.70 to obtain the concentrations of isoprene and monoterpenes respectively. Similarly, we scaled  
64 the signals of  $C_5H_9^+$  and  $C_{10}H_{17}^+$  measured by the Vocus-PTR-ToF-MS with a factor of 1.25 and  
65 1.67 to obtain the concentrations of isoprene and monoterpenes respectively. Then good  
66 agreements were observed for isoprene and monoterpenes between CHARON-PTR-ToF-MS and  
67 Vocus-PTR-ToF-MS (**Fig. S12**). We found that  $C_3H_7O^+$  (acetone + propanal) measured by  
68 CHARON-PTR-ToF-MS were higher than that measured by Vocus- PTR-ToF-MS by a factor of  
69 ~2.5. The differences of  $C_3H_7O^+$  could be due to PTR-MS fragmentation of higher-molecular-  
70 weight VOCs that produce signals at the ion mass of  $C_3H_7O^+$  or differences in the detection of  
71 acetone and propanal from the two PTR-MS instruments. Besides, the Vocus-PTR-ToF-MS cannot  
72 quantify the concentration of methanol ( $CH_5O^+$ ) due to reduced ion transmission at lower masses  
73 ( $m/z < 40$ ), thus no comparison was made.

74 We also summarized the comparisons of a suite of VOC ions measured by Vocus- PTR-ToF-  
75 MS and CHARON- PTR-ToF-MS during the second measurement stage (22<sup>nd</sup>-30<sup>th</sup> June) in **Table**  
76 **S4**. More than 75 VOC ions measured by these two PTR-MS instruments showed good correlations  
77 ( $r > 0.5$ ). However, the concentrations of these well-correlated VOC ions measured by Vocus-  
78 PTR-ToF-MS were generally higher than those measured by CHARON- PTR-ToF-MS by factors  
79 of 1-10. Note that the total concentrations of major VOC ions measured by the CHARON-PTR-  
80 ToF-MS and the Vocus-PTR-ToF-MS were comparable (**Fig. S5**). Therefore, the differences for  
81 individual VOC species could result from the different sensitivities of each VOC species or  
82 fragmentation patterns between these two instruments. In addition, we employed different  
83 calculation method for the CHARON-PTR-ToF-MS data and the Vocus-PTR-ToF-MS data, which  
84 introduced external differences for the comparison of uncalibrated VOC ions.

85 During the first measurement stage, many VOCs detected by CHARON-PTR-ToF-MS also  
86 correlated with those measured by Vocus-PTR-ToF-MS. However, the actual PTR-MS drift tube  
87 temperatures were different between the first and second measurement stage, which leads to the  
88 disagreement of VOC concentrations over the entire campaign. Here we adopted a simple method  
89 to scale the concentrations of selected VOC ions during the first measurement stage. Specifically,  
90 the selected VOC ions measured by CHARON- PTR-ToF-MS have good correlations with those  
91 measured by Vocus-PTR-ToF-MS during both measurement stages. Then we scaled the

92 concentrations of each selected VOC ions based on the slope differences of first measurement stage  
 93 to second one. This simple correction method was validated with the calibrated VOC species (**Fig.**  
 94 **S12**) and useful for other uncalibrated VOC species like oxygenated VOCs and green leaf volatiles  
 95 (GLV) species (**Figs. S13 and S14**). Therefore, we can present a consistent VOC data set measured  
 96 by CHARON-PTR-ToF-MS for the entire campaign.

97

**Table S1.** Overview of instruments deployed in the measurement container.

| Measured parameters                                              | Instruments                                  | Measurement period |
|------------------------------------------------------------------|----------------------------------------------|--------------------|
| Meteorological parameters                                        | WS700 (Lufft GmbH)                           | 06/05-06/30, 2020  |
| O <sub>3</sub>                                                   | Cranox II (Eco Physics®)                     | 06/10-06/30, 2020  |
| CO, CO <sub>2</sub> , CH <sub>4</sub> , H <sub>2</sub> O         | CRDS (G2401, Picarro Inc.)                   | 06/10-06/30, 2020  |
| Particle number concentration (> 2.5 nm)                         | CPC3776 (TSI Inc.)                           | 06/05-06/12, 2020  |
| Particle size distribution (10-410 nm)                           | NanoScan SMPS3910 (TSI Inc.)                 | 06/05-06/30, 2020  |
| Black carbon (BC)                                                | MA200 (AethLabs Inc.)                        | 06/05-06/30, 2020  |
| Particle concentration (PM <sub>2.5</sub> and PM <sub>10</sub> ) | Fidas200 (Palas GmbH)                        | 06/05-06/30, 2020  |
| VOCs and semi-volatile particles                                 | CHARON-PTR-ToF-MS<br>(IONICON GmbH)          | 06/05-06/30, 2020  |
| VOCs and oxygenated VOCs                                         | Vocus-PTR-ToF-MS<br>(Aerodyne Research Inc.) | 06/10-06/30, 2020  |

98

**Table S2.** Compositions of gas standard for the calibrations of CHARON-PTR-ToF-MS and Vocus-PTR-ToF-MS.

| IONICON certificated gas standard |             | FZJ home-made gas standard |               |
|-----------------------------------|-------------|----------------------------|---------------|
| Components                        | Conc. (ppb) | Components                 | Conc. (ppb)   |
| methanol                          | 98.5 ± 9.1  | methanol                   | 867.7 ± 61.7  |
| acetone                           | 98.0 ± 9.1  | acetonitrile               | 865.4 ± 61.5  |
| isoprene                          | 103.0 ± 9.5 | acetaldehyde               | 1229.3 ± 87.4 |
| benzene                           | 94.0 ± 8.7  | isoprene                   | 815.5 ± 58.0  |
| toluene                           | 97.0 ± 9.0  | benzene                    | 946.7 ± 67.3  |
| o-xylene                          | 102.0 ± 9.4 | toluene                    | 945.4 ± 67.2  |
| p-xylene                          | 98.3 ± 9.1  | o-xylene                   | 946.3 ± 67.3  |
| m-xylene                          | 94.1 ± 8.8  | chlorobenzene              | 962.8 ± 68.4  |
| 1,3,5-trimethylbenzene            | 108.0 ± 9.9 | α-pinene                   | 845.5 ± 60.1  |
| α-pinene                          | 101.0 ± 9.3 | 1-butanol                  | 859.8 ± 61.1  |
| limonene                          | 95.0 ± 8.8  | acetone                    | 1181.5 ± 84.0 |
|                                   |             | 2-butanone                 | 1026.4 ± 73.0 |
|                                   |             | 3-pentanone                | 1045.1 ± 74.3 |
|                                   |             | methyl vinyl ketone        | 1018.4 ± 72.4 |
|                                   |             | (1R)-(+)-norpinone         | 502.9 ± 35.8  |

**Table S3.** List of 157 VOC ions measured by the Vocus-PTR-ToF-MS included for the PMF analysis

| VOC Ion mass (m/z) | Ion formula                                                | Suggested compounds                                  | Averaged mixing ratio (ppb) | Standard deviation |
|--------------------|------------------------------------------------------------|------------------------------------------------------|-----------------------------|--------------------|
| 41.039             | C <sub>3</sub> H <sub>5</sub> <sup>+</sup>                 | fragment                                             | 0.1852                      | 0.4618             |
| 42.034             | C <sub>2</sub> H <sub>4</sub> N <sup>+</sup>               | acetonitrile                                         | 0.0402                      | 0.0213             |
| 43.018             | C <sub>2</sub> H <sub>3</sub> O <sup>+</sup>               | fragment                                             | 0.3649                      | 0.2289             |
| 43.054             | C <sub>3</sub> H <sub>7</sub> <sup>+</sup>                 | fragment                                             | 0.2127                      | 0.5983             |
| 47.049             | C <sub>2</sub> H <sub>7</sub> O <sup>+</sup>               | ethanol                                              | 0.2840                      | 0.3444             |
| 53.002             | C <sub>3</sub> HO <sup>+</sup>                             | unknown                                              | 0.0252                      | 0.0379             |
| 53.039             | C <sub>4</sub> H <sub>5</sub> <sup>+</sup>                 | fragment                                             | 0.0092                      | 0.0076             |
| 57.033             | C <sub>3</sub> H <sub>5</sub> O <sup>+</sup>               | acrolein                                             | 0.1823                      | 0.2125             |
| 58.041             | C <sub>3</sub> H <sub>6</sub> O <sup>+</sup>               | acetone charged transfer                             | 0.0030                      | 0.0019             |
| 59.049             | C <sub>3</sub> H <sub>7</sub> O <sup>+</sup>               | acetone                                              | 2.0768                      | 0.7845             |
| 61.028             | C <sub>2</sub> H <sub>5</sub> O <sub>2</sub> <sup>+</sup>  | acetic acid                                          | 1.1125                      | 0.6110             |
| 63.023             | C <sub>5</sub> H <sub>3</sub> <sup>+</sup>                 | unknown                                              | 0.0113                      | 0.0150             |
| 65.023             | CH <sub>5</sub> O <sub>3</sub> <sup>+</sup>                | unknown                                              | 0.0011                      | 0.0009             |
| 66.046             | C <sub>5</sub> H <sub>6</sub> <sup>+</sup>                 | C <sub>5</sub> H <sub>7</sub> charged transfer       | 0.0015                      | 0.0019             |
| 67.054             | C <sub>5</sub> H <sub>7</sub> <sup>+</sup>                 | fragment                                             | 0.0282                      | 0.0234             |
| 68.062             | C <sub>5</sub> H <sub>8</sub> <sup>+</sup>                 | C <sub>5</sub> H <sub>9</sub> charged transfer       | 0.0019                      | 0.0024             |
| 69.033             | C <sub>4</sub> H <sub>5</sub> O <sup>+</sup>               | furan                                                | 0.0097                      | 0.0062             |
| 69.07              | C <sub>5</sub> H <sub>9</sub> <sup>+</sup>                 | isoprene                                             | 0.4223                      | 0.3694             |
| 70.041             | C <sub>4</sub> H <sub>6</sub> O <sup>+</sup>               | C <sub>4</sub> H <sub>7</sub> O charged transfer     | 0.0006                      | 0.0004             |
| 71.049             | C <sub>4</sub> H <sub>7</sub> O <sup>+</sup>               | MVK/methacrolein                                     | 0.1870                      | 0.1122             |
| 73.028             | C <sub>3</sub> H <sub>5</sub> O <sub>2</sub> <sup>+</sup>  | methyl glyoxal/acrylic acid                          | 0.0467                      | 0.0430             |
| 73.065             | C <sub>4</sub> H <sub>9</sub> O <sup>+</sup>               | MEK/butanal                                          | 0.2158                      | 0.1518             |
| 75.044             | C <sub>3</sub> H <sub>7</sub> O <sub>2</sub> <sup>+</sup>  | acetone water cluster                                | 0.2679                      | 0.1299             |
| 77.023             | C <sub>2</sub> H <sub>5</sub> O <sub>3</sub> <sup>+</sup>  | glycolic acid                                        | 0.0172                      | 0.0167             |
| 77.06              | C <sub>3</sub> H <sub>9</sub> O <sub>2</sub> <sup>+</sup>  | ethylene glycol                                      | 0.5114                      | 0.1969             |
| 79.039             | C <sub>2</sub> H <sub>7</sub> O <sub>3</sub> <sup>+</sup>  | acetic acid cluster                                  | 0.4875                      | 0.3103             |
| 79.054             | C <sub>6</sub> H <sub>7</sub> <sup>+</sup>                 | benzene                                              | 0.0889                      | 0.0788             |
| 81.07              | C <sub>6</sub> H <sub>9</sub> <sup>+</sup>                 | monoterpene fragment                                 | 0.4589                      | 0.6799             |
| 83.049             | C <sub>5</sub> H <sub>7</sub> O <sup>+</sup>               | methyl furan                                         | 0.0323                      | 0.0176             |
| 83.086             | C <sub>6</sub> H <sub>11</sub> <sup>+</sup>                | fragment                                             | 0.0503                      | 0.0488             |
| 85.028             | C <sub>4</sub> H <sub>5</sub> O <sub>2</sub> <sup>+</sup>  | furanone/hydroxy furan                               | 0.0217                      | 0.0141             |
| 85.065             | C <sub>5</sub> H <sub>9</sub> O <sup>+</sup>               | methylcyclopentane                                   | 0.0322                      | 0.0161             |
| 86.073             | C <sub>5</sub> H <sub>10</sub> O <sup>+</sup>              | C <sub>5</sub> H <sub>11</sub> O charged transfer    | 0.0004                      | 0.0002             |
| 87.044             | C <sub>4</sub> H <sub>7</sub> O <sub>2</sub> <sup>+</sup>  | 2,3-butanedione/butyrolactone                        | 0.1783                      | 0.1107             |
| 87.08              | C <sub>5</sub> H <sub>11</sub> O <sup>+</sup>              | pentanal/pentanone/3-methylbutanal/allyl ethyl ether | 0.0399                      | 0.0490             |
| 89.06              | C <sub>4</sub> H <sub>9</sub> O <sub>2</sub> <sup>+</sup>  | ethyl acetate/butanoic acid                          | 0.2904                      | 0.2370             |
| 91.039             | C <sub>3</sub> H <sub>7</sub> O <sub>3</sub> <sup>+</sup>  | lactic acid                                          | 0.0260                      | 0.0144             |
| 91.054             | C <sub>7</sub> H <sub>7</sub> <sup>+</sup>                 | fragment                                             | 0.0171                      | 0.0152             |
| 91.075             | C <sub>4</sub> H <sub>11</sub> O <sub>2</sub> <sup>+</sup> | water cluster of C <sub>4</sub> H <sub>9</sub> O     | 0.0645                      | 0.0732             |
| 92.062             | C <sub>7</sub> H <sub>8</sub> <sup>+</sup>                 | toluene charged transfer                             | 0.0060                      | 0.0068             |

|         |                                                            |                                                    |        |        |
|---------|------------------------------------------------------------|----------------------------------------------------|--------|--------|
| 93.018  | C <sub>2</sub> H <sub>5</sub> O <sub>4</sub> <sup>+</sup>  | unknown                                            | 0.0008 | 0.0007 |
| 93.055  | C <sub>3</sub> H <sub>9</sub> O <sub>3</sub> <sup>+</sup>  | propionic acid water cluster                       | 0.0363 | 0.0170 |
| 93.07   | C <sub>7</sub> H <sub>9</sub> <sup>+</sup>                 | toluene                                            | 0.1096 | 0.0742 |
| 95.034  | C <sub>2</sub> H <sub>7</sub> O <sub>4</sub> <sup>+</sup>  | unknown                                            | 0.0074 | 0.0058 |
| 95.049  | C <sub>6</sub> H <sub>7</sub> O <sup>+</sup>               | phenol                                             | 0.0747 | 0.0581 |
| 95.086  | C <sub>7</sub> H <sub>11</sub> <sup>+</sup>                | monoterpene fragment                               | 0.0364 | 0.0420 |
| 97.028  | C <sub>5</sub> H <sub>5</sub> O <sub>2</sub> <sup>+</sup>  | furfural                                           | 0.0276 | 0.0195 |
| 97.065  | C <sub>6</sub> H <sub>9</sub> O <sup>+</sup>               | 2-ethylfuran/2,5-dimethylfuran                     | 0.0166 | 0.0073 |
| 97.101  | C <sub>7</sub> H <sub>13</sub> <sup>+</sup>                | fragment                                           | 0.0116 | 0.0142 |
| 99.044  | C <sub>5</sub> H <sub>7</sub> O <sub>2</sub> <sup>+</sup>  | furfuryl alcohol                                   | 0.0537 | 0.0329 |
| 99.08   | C <sub>6</sub> H <sub>11</sub> O <sup>+</sup>              | cyclohexanone                                      | 0.0293 | 0.0173 |
| 101.06  | C <sub>5</sub> H <sub>9</sub> O <sub>2</sub> <sup>+</sup>  | methyl methacrylate                                | 0.0971 | 0.0551 |
| 101.096 | C <sub>6</sub> H <sub>13</sub> O <sup>+</sup>              | hexanals/hexanones                                 | 0.0177 | 0.0105 |
| 103.039 | C <sub>4</sub> H <sub>7</sub> O <sub>3</sub> <sup>+</sup>  | acetic anhydride                                   | 0.0328 | 0.0169 |
| 103.075 | C <sub>5</sub> H <sub>11</sub> O <sub>2</sub> <sup>+</sup> | butanonate                                         | 0.0177 | 0.0092 |
| 105.033 | C <sub>7</sub> H <sub>5</sub> O <sup>+</sup>               | C <sub>7</sub> 1-oxy 6 DBE                         | 0.0030 | 0.0023 |
| 105.055 | C <sub>4</sub> H <sub>9</sub> O <sub>3</sub> <sup>+</sup>  | multiple                                           | 0.0295 | 0.0166 |
| 105.091 | C <sub>5</sub> H <sub>13</sub> O <sub>2</sub> <sup>+</sup> | 1,5-pentanediol                                    | 0.0190 | 0.0140 |
| 106.078 | C <sub>8</sub> H <sub>10</sub> <sup>+</sup>                | C <sub>8</sub> aromatic charged transfer           | 0.0010 | 0.0008 |
| 107.086 | C <sub>8</sub> H <sub>11</sub> <sup>+</sup>                | C <sub>8</sub> aromatics                           | 0.0523 | 0.0411 |
| 109.065 | C <sub>7</sub> H <sub>9</sub> O <sup>+</sup>               | cresol                                             | 0.0101 | 0.0075 |
| 109.101 | C <sub>8</sub> H <sub>13</sub> <sup>+</sup>                | terpene fragment                                   | 0.0139 | 0.0249 |
| 111.044 | C <sub>6</sub> H <sub>7</sub> O <sub>2</sub> <sup>+</sup>  | catechol/benzene diol                              | 0.0406 | 0.0319 |
| 111.08  | C <sub>7</sub> H <sub>11</sub> O <sup>+</sup>              | multiple                                           | 0.0149 | 0.0111 |
| 113.023 | C <sub>5</sub> H <sub>5</sub> O <sub>3</sub> <sup>+</sup>  | unknown                                            | 0.0188 | 0.0131 |
| 113.06  | C <sub>6</sub> H <sub>9</sub> O <sub>2</sub> <sup>+</sup>  | unknown                                            | 0.0214 | 0.0108 |
| 113.096 | C <sub>7</sub> H <sub>13</sub> O <sup>+</sup>              | ethyl cyclopentanone/                              | 0.0081 | 0.0049 |
| 115.039 | C <sub>5</sub> H <sub>7</sub> O <sub>3</sub> <sup>+</sup>  | C <sub>5</sub> 3-oxy 3D BE                         | 0.0127 | 0.0090 |
| 115.075 | C <sub>6</sub> H <sub>11</sub> O <sub>2</sub> <sup>+</sup> | C <sub>6</sub> diketone isomers/vinylethyl acetate | 0.0338 | 0.0188 |
| 115.112 | C <sub>7</sub> H <sub>15</sub> O <sup>+</sup>              | dimethylpentanone/heptanone                        | 0.0066 | 0.0050 |
| 117.055 | C <sub>5</sub> H <sub>9</sub> O <sub>3</sub> <sup>+</sup>  | C <sub>5</sub> 3-oxy 2D BE isomers                 | 0.0350 | 0.0148 |
| 117.091 | C <sub>6</sub> H <sub>13</sub> O <sub>2</sub> <sup>+</sup> | ethyl butyrate                                     | 0.0171 | 0.0158 |
| 119.034 | C <sub>4</sub> H <sub>7</sub> O <sub>4</sub> <sup>+</sup>  | succinic acid                                      | 0.1406 | 0.1318 |
| 121.101 | C <sub>9</sub> H <sub>13</sub> <sup>+</sup>                | C <sub>9</sub> aromatics                           | 0.0343 | 0.0286 |
| 123.044 | C <sub>7</sub> H <sub>7</sub> O <sub>2</sub> <sup>+</sup>  | benzoic acid                                       | 0.0151 | 0.0101 |
| 123.08  | C <sub>8</sub> H <sub>11</sub> O <sup>+</sup>              | methylanisole                                      | 0.0030 | 0.0015 |
| 123.117 | C <sub>9</sub> H <sub>15</sub> <sup>+</sup>                | terpene fragment                                   | 0.0086 | 0.0052 |
| 125.096 | C <sub>8</sub> H <sub>13</sub> O <sup>+</sup>              | C <sub>4</sub> substituted furan                   | 0.0080 | 0.0043 |
| 129.091 | C <sub>7</sub> H <sub>13</sub> O <sub>2</sub> <sup>+</sup> | allyl ester isobutyric acid                        | 0.0166 | 0.0091 |
| 129.127 | C <sub>8</sub> H <sub>17</sub> O <sup>+</sup>              | octanal                                            | 0.0146 | 0.0120 |
| 131.034 | C <sub>5</sub> H <sub>7</sub> O <sub>4</sub> <sup>+</sup>  | isoprene oxidation product                         | 0.0127 | 0.0074 |
| 131.07  | C <sub>6</sub> H <sub>11</sub> O <sub>3</sub> <sup>+</sup> | multiple                                           | 0.0169 | 0.0124 |
| 131.107 | C <sub>7</sub> H <sub>15</sub> O <sub>2</sub> <sup>+</sup> | C <sub>7</sub> carboxylic acid                     | 0.0045 | 0.0023 |

|         |                                                             |                                                                 |        |        |
|---------|-------------------------------------------------------------|-----------------------------------------------------------------|--------|--------|
| 133.05  | C <sub>5</sub> H <sub>9</sub> O <sub>4</sub> <sup>+</sup>   | glutaric acid                                                   | 0.0160 | 0.0096 |
| 133.101 | C <sub>10</sub> H <sub>13</sub> <sup>+</sup>                | multiple                                                        | 0.0056 | 0.0045 |
| 136.125 | C <sub>10</sub> H <sub>16</sub> <sup>+</sup>                | monoterpene charged transfer                                    | 0.0039 | 0.0057 |
| 137.132 | C <sub>10</sub> H <sub>17</sub> <sup>+</sup>                | monoterpenes                                                    | 0.8682 | 1.4585 |
| 139.075 | C <sub>8</sub> H <sub>11</sub> O <sub>2</sub> <sup>+</sup>  | 2-methoxy-4-methylphenol                                        | 0.0040 | 0.0028 |
| 139.112 | C <sub>9</sub> H <sub>15</sub> O <sup>+</sup>               | monoterpene oxidation product (e.g.,<br>nopinone)               | 0.0527 | 0.0368 |
| 141.055 | C <sub>7</sub> H <sub>9</sub> O <sub>3</sub> <sup>+</sup>   | methoxycatechol                                                 | 0.0066 | 0.0033 |
| 141.091 | C <sub>8</sub> H <sub>13</sub> O <sub>2</sub> <sup>+</sup>  | unknown                                                         | 0.0075 | 0.0044 |
| 141.127 | C <sub>9</sub> H <sub>17</sub> O <sup>+</sup>               | trans-2-nonenal                                                 | 0.0056 | 0.0029 |
| 143.07  | C <sub>7</sub> H <sub>11</sub> O <sub>3</sub> <sup>+</sup>  | unknown                                                         | 0.0062 | 0.0036 |
| 143.107 | C <sub>8</sub> H <sub>15</sub> O <sub>2</sub> <sup>+</sup>  | unknown                                                         | 0.0128 | 0.0101 |
| 143.143 | C <sub>9</sub> H <sub>19</sub> O <sup>+</sup>               | nonanal/2-nonanone                                              | 0.0341 | 0.0299 |
| 145.086 | C <sub>7</sub> H <sub>13</sub> O <sub>3</sub> <sup>+</sup>  | unknown                                                         | 0.0058 | 0.0029 |
| 145.122 | C <sub>8</sub> H <sub>17</sub> O <sub>2</sub> <sup>+</sup>  | ethyl hexanoate                                                 | 0.0033 | 0.0018 |
| 147.065 | C <sub>6</sub> H <sub>11</sub> O <sub>4</sub> <sup>+</sup>  | unknown                                                         | 0.0072 | 0.0042 |
| 149.023 | C <sub>8</sub> H <sub>5</sub> O <sub>3</sub> <sup>+</sup>   | phthalic anhydride                                              | 0.0019 | 0.0018 |
| 149.096 | C <sub>10</sub> H <sub>13</sub> O <sup>+</sup>              | unknown                                                         | 0.0034 | 0.0030 |
| 149.132 | C <sub>11</sub> H <sub>17</sub> <sup>+</sup>                | sesquiterpene fragment                                          | 0.0013 | 0.0011 |
| 151.075 | C <sub>9</sub> H <sub>11</sub> O <sub>2</sub> <sup>+</sup>  | vinyl guaiacol/benzyl acetate                                   | 0.0015 | 0.0009 |
| 151.112 | C <sub>10</sub> H <sub>15</sub> O <sup>+</sup>              | monoterpene oxidation product (e.g.,<br>pinonaldehyde fragment) | 0.0244 | 0.0165 |
| 153.055 | C <sub>8</sub> H <sub>9</sub> O <sub>3</sub> <sup>+</sup>   | methyl salicylate                                               | 0.0179 | 0.0081 |
| 153.091 | C <sub>9</sub> H <sub>13</sub> O <sub>2</sub> <sup>+</sup>  | unknown                                                         | 0.0050 | 0.0027 |
| 153.127 | C <sub>10</sub> H <sub>17</sub> O <sup>+</sup>              | camphor/monoterpene oxidation product                           | 0.0230 | 0.0150 |
| 155.07  | C <sub>8</sub> H <sub>11</sub> O <sub>3</sub> <sup>+</sup>  | syringol                                                        | 0.0025 | 0.0016 |
| 155.107 | C <sub>9</sub> H <sub>15</sub> O <sub>2</sub> <sup>+</sup>  | monoterpene oxidation product                                   | 0.0060 | 0.0044 |
| 155.143 | C <sub>10</sub> H <sub>19</sub> O <sup>+</sup>              | linalool                                                        | 0.0091 | 0.0130 |
| 157.086 | C <sub>8</sub> H <sub>13</sub> O <sub>3</sub> <sup>+</sup>  | monoterpene oxidation product (e.g.,<br>terpenylic acid)        | 0.0057 | 0.0032 |
| 157.122 | C <sub>9</sub> H <sub>17</sub> O <sub>2</sub> <sup>+</sup>  | C <sub>9</sub> 2-oxy 2DBE isomers                               | 0.0110 | 0.0064 |
| 157.159 | C <sub>10</sub> H <sub>21</sub> O <sup>+</sup>              | menthol-type monoterpenes/ decanal                              | 0.0189 | 0.0471 |
| 159.065 | C <sub>7</sub> H <sub>11</sub> O <sub>4</sub> <sup>+</sup>  | 3,6-oxoheptanoic acid                                           | 0.0045 | 0.0024 |
| 159.102 | C <sub>8</sub> H <sub>15</sub> O <sub>3</sub> <sup>+</sup>  | monoterpene oxidation product                                   | 0.0046 | 0.0036 |
| 159.138 | C <sub>9</sub> H <sub>19</sub> O <sub>2</sub> <sup>+</sup>  | methyl octanoate                                                | 0.0027 | 0.0015 |
| 161.081 | C <sub>7</sub> H <sub>13</sub> O <sub>4</sub> <sup>+</sup>  | unknown                                                         | 0.0032 | 0.0019 |
| 165.055 | C <sub>9</sub> H <sub>9</sub> O <sub>3</sub> <sup>+</sup>   | unknown                                                         | 0.0007 | 0.0006 |
| 167.034 | C <sub>8</sub> H <sub>7</sub> O <sub>4</sub> <sup>+</sup>   | terephthalic acid                                               | 0.0047 | 0.0034 |
| 167.107 | C <sub>10</sub> H <sub>15</sub> O <sub>2</sub> <sup>+</sup> | monoterpene oxidation product                                   | 0.0063 | 0.0033 |
| 169.05  | C <sub>8</sub> H <sub>9</sub> O <sub>4</sub> <sup>+</sup>   | C <sub>8</sub> 4-oxy 5-DBE                                      | 0.0006 | 0.0005 |
| 169.086 | C <sub>9</sub> H <sub>13</sub> O <sub>3</sub> <sup>+</sup>  | C <sub>9</sub> 3-oxy 4-DBE                                      | 0.0021 | 0.0013 |
| 169.122 | C <sub>10</sub> H <sub>17</sub> O <sub>2</sub> <sup>+</sup> | monoterpene oxidation product (e.g.<br>pinonaldehyde)           | 0.0216 | 0.0160 |
| 171.029 | C <sub>7</sub> H <sub>7</sub> O <sub>5</sub> <sup>+</sup>   | unknown                                                         | 0.0014 | 0.0011 |
| 171.065 | C <sub>8</sub> H <sub>11</sub> O <sub>4</sub> <sup>+</sup>  | unknown                                                         | 0.0012 | 0.0006 |



|         |                                                             |                                                                |        |        |
|---------|-------------------------------------------------------------|----------------------------------------------------------------|--------|--------|
| 171.102 | C <sub>9</sub> H <sub>15</sub> O <sub>3</sub> <sup>+</sup>  | monoterpene oxidation product                                  | 0.0048 | 0.0024 |
| 171.138 | C <sub>10</sub> H <sub>19</sub> O <sub>2</sub> <sup>+</sup> | linalool oxide                                                 | 0.0066 | 0.0040 |
| 173.044 | C <sub>7</sub> H <sub>9</sub> O <sub>5</sub> <sup>+</sup>   | toluene oxidation product                                      | 0.0007 | 0.0005 |
| 173.081 | C <sub>8</sub> H <sub>13</sub> O <sub>4</sub> <sup>+</sup>  | monoterpene oxidation product                                  | 0.0020 | 0.0013 |
| 173.117 | C <sub>9</sub> H <sub>17</sub> O <sub>3</sub> <sup>+</sup>  | unknown                                                        | 0.0014 | 0.0016 |
| 173.154 | C <sub>10</sub> H <sub>21</sub> O <sub>2</sub> <sup>+</sup> | unknown                                                        | 0.0016 | 0.0011 |
| 175.06  | C <sub>7</sub> H <sub>11</sub> O <sub>5</sub> <sup>+</sup>  | unknown                                                        | 0.0024 | 0.0013 |
| 175.096 | C <sub>8</sub> H <sub>15</sub> O <sub>4</sub> <sup>+</sup>  | monoterpene oxidation product                                  | 0.0014 | 0.0009 |
| 183.102 | C <sub>10</sub> H <sub>15</sub> O <sub>3</sub> <sup>+</sup> | monoterpene oxidation product                                  | 0.0026 | 0.0014 |
| 185.117 | C <sub>10</sub> H <sub>17</sub> O <sub>3</sub> <sup>+</sup> | monoterpene oxidation product (e.g., <i>cis</i> -pinonic acid) | 0.0066 | 0.0037 |
| 185.154 | C <sub>11</sub> H <sub>21</sub> O <sub>2</sub> <sup>+</sup> | unknown                                                        | 0.0007 | 0.0004 |
| 187.096 | C <sub>9</sub> H <sub>15</sub> O <sub>4</sub> <sup>+</sup>  | monoterpene oxidation product (e.g., pinic acid)               | 0.0018 | 0.0009 |
| 189.076 | C <sub>8</sub> H <sub>13</sub> O <sub>5</sub> <sup>+</sup>  | monoterpene oxidation product                                  | 0.0009 | 0.0005 |
| 189.149 | C <sub>10</sub> H <sub>21</sub> O <sub>3</sub> <sup>+</sup> | unknown                                                        | 0.0002 | 0.0002 |
| 193.159 | C <sub>13</sub> H <sub>21</sub> O <sup>+</sup>              | unknown                                                        | 0.0004 | 0.0010 |
| 195.138 | C <sub>12</sub> H <sub>19</sub> O <sub>2</sub> <sup>+</sup> | unknown                                                        | 0.0004 | 0.0002 |
| 197.081 | C <sub>10</sub> H <sub>13</sub> O <sub>4</sub> <sup>+</sup> | unknown                                                        | 0.0003 | 0.0002 |
| 197.117 | C <sub>11</sub> H <sub>17</sub> O <sub>3</sub> <sup>+</sup> | unknown                                                        | 0.0004 | 0.0002 |
| 197.154 | C <sub>12</sub> H <sub>21</sub> O <sub>2</sub> <sup>+</sup> | unknown                                                        | 0.0002 | 0.0002 |
| 199.096 | C <sub>10</sub> H <sub>15</sub> O <sub>4</sub> <sup>+</sup> | monoterpene oxidation product                                  | 0.0010 | 0.0005 |
| 199.133 | C <sub>11</sub> H <sub>19</sub> O <sub>3</sub> <sup>+</sup> | unknown                                                        | 0.0007 | 0.0003 |
| 201.112 | C <sub>10</sub> H <sub>17</sub> O <sub>4</sub> <sup>+</sup> | monoterpene oxidation product                                  | 0.0011 | 0.0006 |
| 203.091 | C <sub>9</sub> H <sub>15</sub> O <sub>5</sub> <sup>+</sup>  | monoterpene oxidation product                                  | 0.0004 | 0.0003 |
| 203.128 | C <sub>10</sub> H <sub>19</sub> O <sub>4</sub> <sup>+</sup> | unknown                                                        | 0.0002 | 0.0002 |
| 205.071 | C <sub>8</sub> H <sub>13</sub> O <sub>6</sub> <sup>+</sup>  | monoterpene oxidation product                                  | 0.0003 | 0.0002 |
| 205.195 | C <sub>15</sub> H <sub>25</sub> <sup>+</sup>                | sesquiterpenes                                                 | 0.0039 | 0.0037 |
| 209.154 | C <sub>13</sub> H <sub>21</sub> O <sub>2</sub> <sup>+</sup> | unknown                                                        | 0.0004 | 0.0003 |
| 213.076 | C <sub>10</sub> H <sub>13</sub> O <sub>5</sub> <sup>+</sup> | monoterpene oxidation product                                  | 0.0002 | 0.0001 |
| 215.091 | C <sub>10</sub> H <sub>15</sub> O <sub>5</sub> <sup>+</sup> | monoterpene oxidation product                                  | 0.0003 | 0.0002 |
| 215.128 | C <sub>11</sub> H <sub>19</sub> O <sub>4</sub> <sup>+</sup> | unknown                                                        | 0.0002 | 0.0002 |
| 217.107 | C <sub>10</sub> H <sub>17</sub> O <sub>5</sub> <sup>+</sup> | monoterpene oxidation product                                  | 0.0003 | 0.0001 |
| 217.143 | C <sub>11</sub> H <sub>21</sub> O <sub>4</sub> <sup>+</sup> | unknown                                                        | 0.0001 | 0.0001 |
| 223.169 | C <sub>14</sub> H <sub>23</sub> O <sub>2</sub> <sup>+</sup> | sesquiterpene oxidation product                                | 0.0003 | 0.0011 |

**Table S4.** Comparison of 112 VOC ions measured by Vocus-PTR-ToF-MS to those measured by CHARON-PTR-ToF-MS during second measurement period (22<sup>nd</sup>-30<sup>th</sup> June 2020).

| No. | VOC ions                                                   | Pearson's r | Slope  | Intercept | No. | VOC ions                                                   | Pearson's r | Slope  | Intercept |
|-----|------------------------------------------------------------|-------------|--------|-----------|-----|------------------------------------------------------------|-------------|--------|-----------|
| 1   | C <sub>3</sub> H <sub>5</sub> <sup>+</sup>                 | 0.10        | 0.002  | 0.097     | 57  | C <sub>7</sub> H <sub>13</sub> O <sub>2</sub> <sup>+</sup> | <b>0.86</b> | 2.170  | 0.002     |
| 2   | C <sub>3</sub> H <sub>7</sub> <sup>+</sup>                 | 0.08        | 0.004  | 0.077     | 58  | C <sub>8</sub> H <sub>17</sub> O <sup>+</sup>              | 0.01        | 0.119  | 0.012     |
| 3   | C <sub>2</sub> H <sub>7</sub> O <sup>+</sup>               | <b>0.74</b> | 4.405  | 0.083     | 59  | C <sub>5</sub> H <sub>7</sub> O <sub>4</sub> <sup>+</sup>  | <b>0.67</b> | 3.582  | -0.008    |
| 4   | C <sub>4</sub> H <sub>5</sub> <sup>+</sup>                 | 0.38        | 0.038  | 0.011     | 60  | C <sub>6</sub> H <sub>11</sub> O <sub>3</sub> <sup>+</sup> | 0.11        | 2.379  | 0.013     |
| 5   | C <sub>3</sub> H <sub>7</sub> O <sup>+</sup>               | <b>0.82</b> | 0.429  | 0.030     | 61  | C <sub>7</sub> H <sub>15</sub> O <sub>2</sub> <sup>+</sup> | <b>0.65</b> | 2.148  | 0.004     |
| 6   | C <sub>2</sub> H <sub>5</sub> O <sub>2</sub> <sup>+</sup>  | <b>0.81</b> | 0.849  | -0.164    | 62  | C <sub>5</sub> H <sub>9</sub> O <sub>4</sub> <sup>+</sup>  | 0.18        | 1.535  | 0.017     |
| 7   | CH <sub>5</sub> O <sub>3</sub> <sup>+</sup>                | -0.31       | -0.036 | 0.001     | 63  | C <sub>10</sub> H <sub>13</sub> <sup>+</sup>               | <b>0.54</b> | 0.307  | 0.003     |
| 8   | C <sub>5</sub> H <sub>7</sub> <sup>+</sup>                 | 0.41        | 0.110  | 0.019     | 64  | C <sub>10</sub> H <sub>17</sub> <sup>+</sup>               | <b>0.59</b> | 0.559  | 0.252     |
| 9   | C <sub>4</sub> H <sub>5</sub> O <sup>+</sup>               | 0.39        | 0.205  | 0.004     | 65  | C <sub>8</sub> H <sub>11</sub> O <sub>2</sub> <sup>+</sup> | 0.41        | 0.239  | 0.003     |
| 10  | C <sub>5</sub> H <sub>9</sub> <sup>+</sup>                 | <b>0.92</b> | 1.652  | 0.025     | 66  | C <sub>9</sub> H <sub>15</sub> O <sup>+</sup>              | <b>0.93</b> | 2.903  | 0.001     |
| 11  | C <sub>4</sub> H <sub>7</sub> O <sup>+</sup>               | <b>0.94</b> | 1.292  | -0.002    | 67  | C <sub>7</sub> H <sub>9</sub> O <sub>3</sub> <sup>+</sup>  | <b>0.69</b> | 0.543  | 0.001     |
| 12  | C <sub>3</sub> H <sub>5</sub> O <sub>2</sub> <sup>+</sup>  | <b>0.75</b> | 0.775  | -0.021    | 68  | C <sub>8</sub> H <sub>13</sub> O <sub>2</sub> <sup>+</sup> | <b>0.76</b> | 1.004  | 0.003     |
| 13  | C <sub>4</sub> H <sub>9</sub> O <sup>+</sup>               | <b>0.96</b> | 2.256  | -0.053    | 69  | C <sub>9</sub> H <sub>17</sub> O <sup>+</sup>              | <b>0.55</b> | 2.281  | 0.000     |
| 14  | C <sub>3</sub> H <sub>7</sub> O <sub>2</sub> <sup>+</sup>  | <b>0.89</b> | 2.842  | -0.001    | 70  | C <sub>7</sub> H <sub>11</sub> O <sub>3</sub> <sup>+</sup> | <b>0.73</b> | 1.841  | 0.001     |
| 15  | C <sub>3</sub> H <sub>9</sub> O <sub>2</sub> <sup>+</sup>  | <b>0.50</b> | 16.469 | 0.185     | 71  | C <sub>8</sub> H <sub>15</sub> O <sub>2</sub> <sup>+</sup> | 0.17        | 1.030  | 0.008     |
| 16  | C <sub>6</sub> H <sub>7</sub> <sup>+</sup>                 | 0.33        | 0.313  | 0.079     | 72  | C <sub>9</sub> H <sub>19</sub> O <sup>+</sup>              | 0.20        | 22.151 | 0.021     |
| 17  | C <sub>6</sub> H <sub>9</sub> <sup>+</sup>                 | <b>0.55</b> | 0.201  | 0.188     | 73  | C <sub>7</sub> H <sub>13</sub> O <sub>3</sub> <sup>+</sup> | <b>0.68</b> | 5.837  | 0.005     |
| 18  | C <sub>5</sub> H <sub>7</sub> O <sup>+</sup>               | <b>0.82</b> | 0.987  | 0.002     | 74  | C <sub>8</sub> H <sub>17</sub> O <sub>2</sub> <sup>+</sup> | <b>0.53</b> | 1.393  | 0.005     |
| 19  | C <sub>6</sub> H <sub>11</sub> <sup>+</sup>                | 0.21        | 0.910  | 0.039     | 75  | C <sub>6</sub> H <sub>11</sub> O <sub>4</sub> <sup>+</sup> | <b>0.54</b> | 3.029  | 0.003     |
| 20  | C <sub>4</sub> H <sub>5</sub> O <sub>2</sub> <sup>+</sup>  | <b>0.71</b> | 0.629  | -0.004    | 76  | C <sub>8</sub> H <sub>5</sub> O <sub>3</sub> <sup>+</sup>  | <b>0.72</b> | 0.256  | 0.001     |
| 21  | C <sub>5</sub> H <sub>9</sub> O <sup>+</sup>               | <b>0.82</b> | 1.702  | 0.004     | 77  | C <sub>10</sub> H <sub>13</sub> O <sup>+</sup>             | <b>0.76</b> | 0.627  | -0.001    |
| 22  | C <sub>4</sub> H <sub>7</sub> O <sub>2</sub> <sup>+</sup>  | <b>0.72</b> | 4.300  | -0.051    | 78  | C <sub>11</sub> H <sub>17</sub> <sup>+</sup>               | 0.37        | 0.311  | 0.002     |
| 23  | C <sub>5</sub> H <sub>11</sub> O <sup>+</sup>              | 0.44        | 3.108  | 0.005     | 79  | C <sub>9</sub> H <sub>11</sub> O <sub>2</sub> <sup>+</sup> | 0.48        | 0.254  | 0.001     |
| 24  | C <sub>4</sub> H <sub>9</sub> O <sub>2</sub> <sup>+</sup>  | <b>0.66</b> | 17.104 | -0.112    | 80  | C <sub>10</sub> H <sub>15</sub> O <sup>+</sup>             | <b>0.87</b> | 1.911  | 0.006     |
| 25  | C <sub>3</sub> H <sub>7</sub> O <sub>3</sub> <sup>+</sup>  | 0.23        | 0.347  | 0.023     | 81  | C <sub>8</sub> H <sub>9</sub> O <sub>3</sub> <sup>+</sup>  | <b>0.85</b> | 1.025  | 0.004     |
| 26  | C <sub>4</sub> H <sub>11</sub> O <sub>2</sub> <sup>+</sup> | <b>0.77</b> | 15.001 | -0.273    | 82  | C <sub>9</sub> H <sub>13</sub> O <sub>2</sub> <sup>+</sup> | -0.04       | -0.048 | 0.006     |
| 27  | C <sub>7</sub> H <sub>9</sub> <sup>+</sup>                 | <b>0.66</b> | 0.499  | 0.056     | 83  | C <sub>10</sub> H <sub>17</sub> O <sup>+</sup>             | <b>0.85</b> | 1.374  | 0.003     |
| 28  | C <sub>6</sub> H <sub>7</sub> O <sup>+</sup>               | <b>0.50</b> | 3.027  | -0.045    | 84  | C <sub>8</sub> H <sub>11</sub> O <sub>3</sub> <sup>+</sup> | <b>0.88</b> | 0.355  | 0.000     |
| 29  | C <sub>7</sub> H <sub>11</sub> <sup>+</sup>                | 0.45        | 0.103  | 0.023     | 85  | C <sub>9</sub> H <sub>15</sub> O <sub>2</sub> <sup>+</sup> | 0.37        | 1.035  | 0.006     |
| 30  | C <sub>5</sub> H <sub>5</sub> O <sub>2</sub> <sup>+</sup>  | <b>0.53</b> | 0.967  | -0.005    | 86  | C <sub>10</sub> H <sub>19</sub> O <sup>+</sup>             | 0.05        | 0.506  | 0.003     |
| 31  | C <sub>6</sub> H <sub>9</sub> O <sup>+</sup>               | <b>0.77</b> | 0.405  | 0.005     | 87  | C <sub>8</sub> H <sub>13</sub> O <sub>3</sub> <sup>+</sup> | 0.46        | 2.795  | 0.005     |

|    |                                                            |             |       |        |     |                                                             |             |        |        |
|----|------------------------------------------------------------|-------------|-------|--------|-----|-------------------------------------------------------------|-------------|--------|--------|
| 32 | C <sub>7</sub> H <sub>13</sub> <sup>+</sup>                | 0.07        | 0.220 | 0.015  | 88  | C <sub>9</sub> H <sub>17</sub> O <sub>2</sub> <sup>+</sup>  | <b>0.62</b> | 2.958  | 0.003  |
| 33 | C <sub>5</sub> H <sub>7</sub> O <sub>2</sub> <sup>+</sup>  | <b>0.62</b> | 1.275 | -0.001 | 89  | C <sub>10</sub> H <sub>21</sub> O <sup>+</sup>              | 0.11        | 25.598 | 0.019  |
| 34 | C <sub>6</sub> H <sub>11</sub> O <sup>+</sup>              | <b>0.91</b> | 3.464 | 0.001  | 90  | C <sub>7</sub> H <sub>11</sub> O <sub>4</sub> <sup>+</sup>  | <b>0.81</b> | 2.565  | -0.001 |
| 35 | C <sub>5</sub> H <sub>9</sub> O <sub>2</sub> <sup>+</sup>  | <b>0.52</b> | 1.931 | 0.039  | 91  | C <sub>9</sub> H <sub>9</sub> O <sub>3</sub> <sup>+</sup>   | <b>0.53</b> | 0.327  | 0.000  |
| 36 | C <sub>6</sub> H <sub>13</sub> O <sup>+</sup>              | <b>0.77</b> | 6.056 | -0.003 | 92  | C <sub>8</sub> H <sub>7</sub> O <sub>4</sub> <sup>+</sup>   | <b>0.64</b> | 3.022  | -0.003 |
| 37 | C <sub>4</sub> H <sub>7</sub> O <sub>3</sub> <sup>+</sup>  | <b>0.80</b> | 4.988 | -0.008 | 93  | C <sub>10</sub> H <sub>15</sub> O <sub>2</sub> <sup>+</sup> | <b>0.79</b> | 1.203  | 0.001  |
| 38 | C <sub>5</sub> H <sub>11</sub> O <sub>2</sub> <sup>+</sup> | <b>0.71</b> | 2.424 | 0.009  | 94  | C <sub>8</sub> H <sub>9</sub> O <sub>4</sub> <sup>+</sup>   | <b>0.53</b> | 0.147  | 0.000  |
| 39 | C <sub>8</sub> H <sub>11</sub> <sup>+</sup>                | <b>0.85</b> | 0.861 | 0.016  | 95  | C <sub>9</sub> H <sub>13</sub> O <sub>3</sub> <sup>+</sup>  | <b>0.67</b> | 0.543  | 0.001  |
| 40 | C <sub>7</sub> H <sub>9</sub> O <sub>1</sub> <sup>+</sup>  | <b>0.50</b> | 0.664 | 0.006  | 96  | C <sub>10</sub> H <sub>17</sub> O <sub>2</sub> <sup>+</sup> | <b>0.57</b> | 8.491  | -0.004 |
| 41 | C <sub>8</sub> H <sub>13</sub> <sup>+</sup>                | 0.10        | 0.172 | 0.015  | 97  | C <sub>7</sub> H <sub>7</sub> O <sub>5</sub> <sup>+</sup>   | 0.17        | 0.367  | 0.002  |
| 42 | C <sub>6</sub> H <sub>7</sub> O <sub>2</sub> <sup>+</sup>  | <b>0.64</b> | 2.227 | -0.010 | 98  | C <sub>8</sub> H <sub>11</sub> O <sub>4</sub> <sup>+</sup>  | <b>0.69</b> | 0.132  | 0.000  |
| 43 | C <sub>7</sub> H <sub>11</sub> O <sup>+</sup>              | <b>0.85</b> | 1.352 | 0.000  | 99  | C <sub>9</sub> H <sub>15</sub> O <sub>3</sub> <sup>+</sup>  | <b>0.57</b> | 1.675  | 0.005  |
| 44 | C <sub>5</sub> H <sub>5</sub> O <sub>3</sub> <sup>+</sup>  | <b>0.74</b> | 0.843 | 0.002  | 100 | C <sub>7</sub> H <sub>9</sub> O <sub>5</sub> <sup>+</sup>   | 0.39        | 0.274  | 0.000  |
| 45 | C <sub>6</sub> H <sub>9</sub> O <sub>2</sub> <sup>+</sup>  | <b>0.88</b> | 1.172 | -0.004 | 101 | C <sub>8</sub> H <sub>13</sub> O <sub>4</sub> <sup>+</sup>  | <b>0.74</b> | 0.982  | 0.000  |
| 46 | C <sub>7</sub> H <sub>13</sub> O <sup>+</sup>              | <b>0.89</b> | 3.037 | 0.003  | 102 | C <sub>10</sub> H <sub>21</sub> O <sub>2</sub> <sup>+</sup> | 0.23        | 0.208  | 0.002  |
| 47 | C <sub>5</sub> H <sub>7</sub> O <sub>3</sub> <sup>+</sup>  | 0.26        | 0.381 | 0.004  | 103 | C <sub>7</sub> H <sub>11</sub> O <sub>5</sub> <sup>+</sup>  | <b>0.71</b> | 1.546  | 0.001  |
| 48 | C <sub>6</sub> H <sub>11</sub> O <sub>2</sub> <sup>+</sup> | <b>0.91</b> | 2.246 | -0.001 | 104 | C <sub>8</sub> H <sub>15</sub> O <sub>4</sub> <sup>+</sup>  | 0.37        | 1.602  | 0.001  |
| 49 | C <sub>7</sub> H <sub>15</sub> O <sup>+</sup>              | <b>0.63</b> | 3.979 | 0.001  | 105 | C <sub>10</sub> H <sub>15</sub> O <sub>3</sub> <sup>+</sup> | <b>0.72</b> | 0.867  | 0.000  |
| 50 | C <sub>5</sub> H <sub>9</sub> O <sub>3</sub> <sup>+</sup>  | <b>0.70</b> | 8.684 | 0.004  | 106 | C <sub>10</sub> H <sub>17</sub> O <sub>3</sub> <sup>+</sup> | 0.23        | 0.819  | 0.006  |
| 51 | C <sub>6</sub> H <sub>13</sub> O <sub>2</sub> <sup>+</sup> | 0.42        | 4.490 | 0.015  | 107 | C <sub>9</sub> H <sub>15</sub> O <sub>4</sub> <sup>+</sup>  | 0.48        | 0.607  | 0.001  |
| 52 | C <sub>9</sub> H <sub>13</sub> <sup>+</sup>                | <b>0.82</b> | 0.826 | 0.008  | 108 | C <sub>8</sub> H <sub>13</sub> O <sub>5</sub> <sup>+</sup>  | <b>0.77</b> | 0.589  | 0.000  |
| 53 | C <sub>7</sub> H <sub>7</sub> O <sub>2</sub> <sup>+</sup>  | <b>0.61</b> | 0.982 | 0.003  | 109 | C <sub>10</sub> H <sub>13</sub> O <sub>4</sub> <sup>+</sup> | 0.37        | 0.071  | 0.000  |
| 54 | C <sub>8</sub> H <sub>11</sub> O <sup>+</sup>              | <b>0.73</b> | 0.387 | 0.001  | 110 | C <sub>10</sub> H <sub>15</sub> O <sub>4</sub> <sup>+</sup> | <b>0.53</b> | 0.097  | 0.000  |
| 55 | C <sub>9</sub> H <sub>15</sub> <sup>+</sup>                | <b>0.66</b> | 0.583 | 0.004  | 111 | C <sub>15</sub> H <sub>25</sub> <sup>+</sup>                | <b>0.71</b> | 0.554  | -0.001 |
| 56 | C <sub>8</sub> H <sub>13</sub> O <sup>+</sup>              | <b>0.59</b> | 0.910 | 0.003  | 112 | C <sub>10</sub> H <sub>15</sub> O <sub>5</sub> <sup>+</sup> | <b>0.87</b> | 0.147  | 0.002  |

101 The Pearson's r was >0.5 in bold.

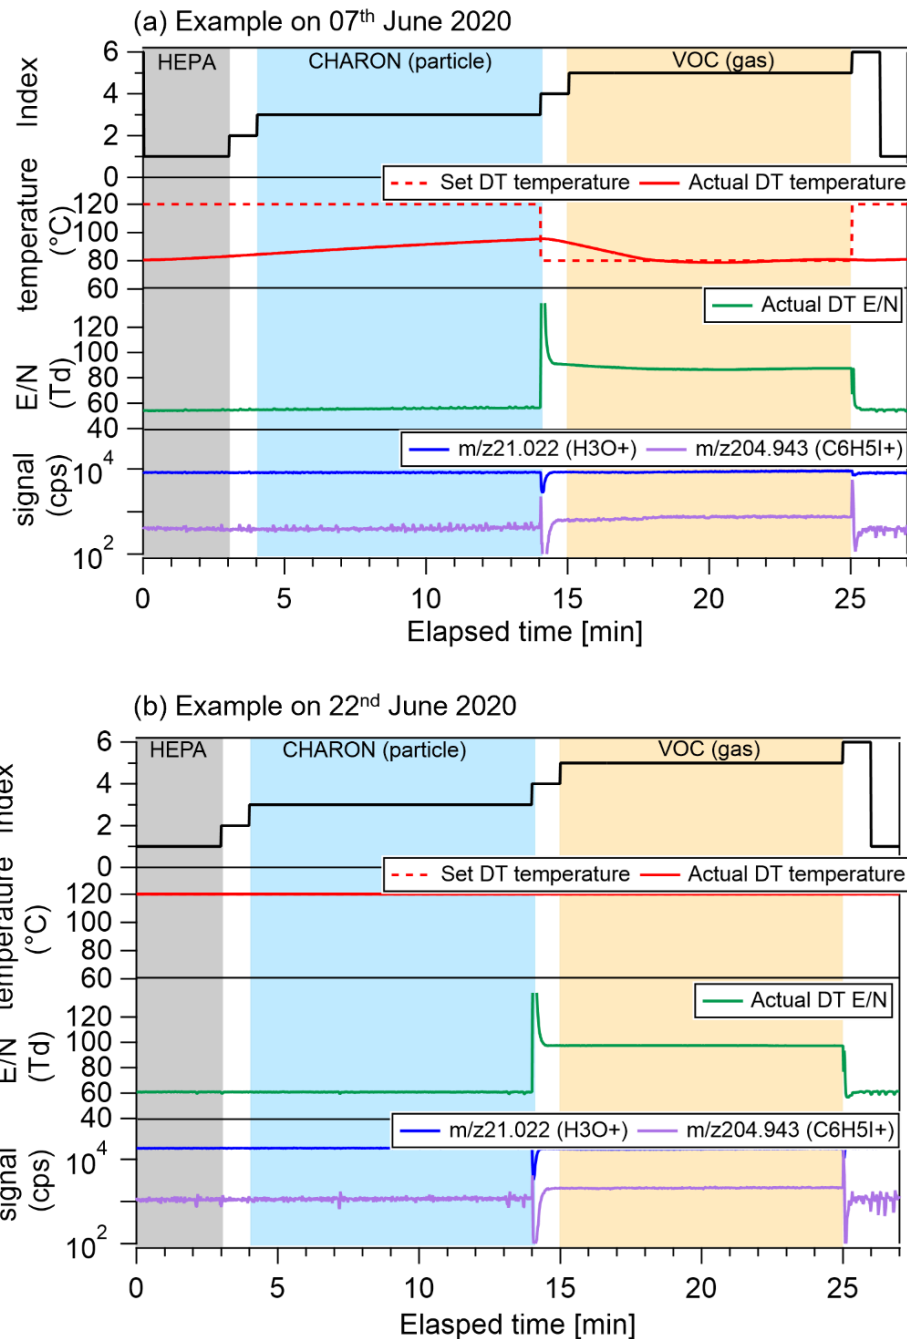

102  
 103 **Figure S1.** Examples of alternatingly measurement cycle in the CHARON-PTR-ToF-MS on (a)  
 104 7<sup>th</sup> of June and (b) 22<sup>nd</sup> of June 2020. Time series of PTR mode index, set and actual PTR drift tube  
 105 (DT) temperature, actual DT E/N value, reagent ion (H<sub>3</sub>O<sup>+</sup>) and mass calibration ion (C<sub>6</sub>H<sub>5</sub>I<sup>+</sup>) for  
 106 the examples.

107  
 108

109

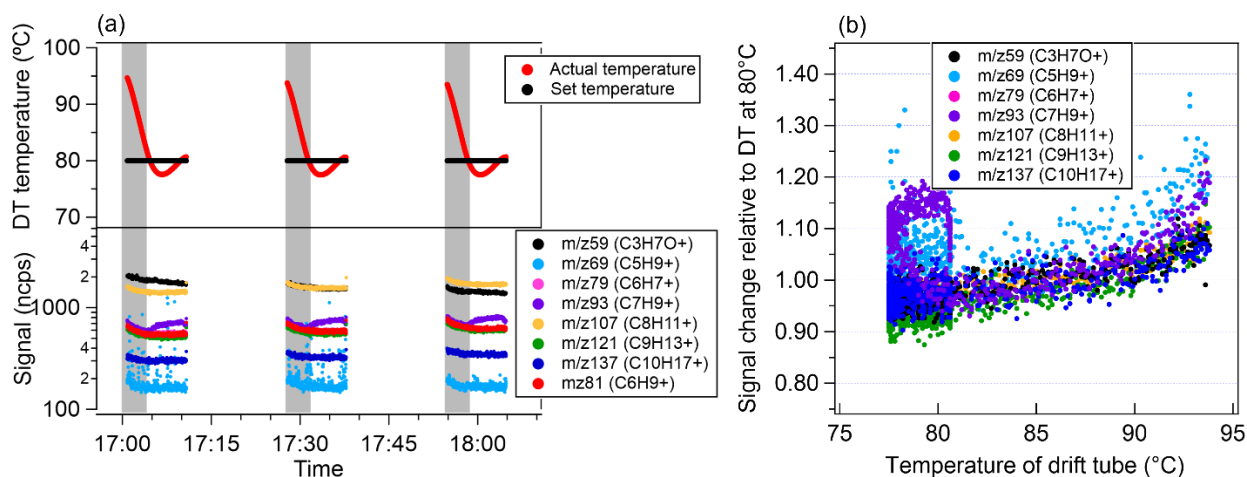

110

111 **Figure S2.** Three alternatingly measurement cycles for the ~100 times diluted IONICON gas  
112 cylinder by the CHARON-PTR-ToF-MS with the same setting during first measurement stage (5<sup>th</sup>-  
113 19<sup>th</sup> of June 2020) of field campaign. (a) Time series of set and actual PTR drift tube (DT)  
114 temperature and the normalized calibrated VOC signals. The grey shaded areas mark the first 4  
115 minutes when the actual DT temperature was rapidly changed back to ~80 °C. (b) Signal change  
116 of VOCs relative to those measured with DT temperature at 80 °C.

117

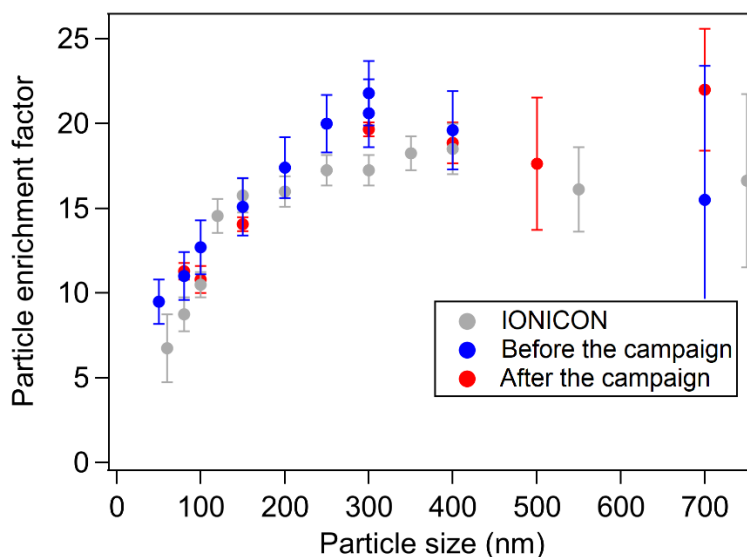

118

119 **Figure S3.** CHARON inlet calibrated enrichment factor of ammonium nitrate as a function of  
120 particle size in the 60-700 nm range before and after the measurement campaign in comparison to  
121 the enrichment factor certified by the IONICON.

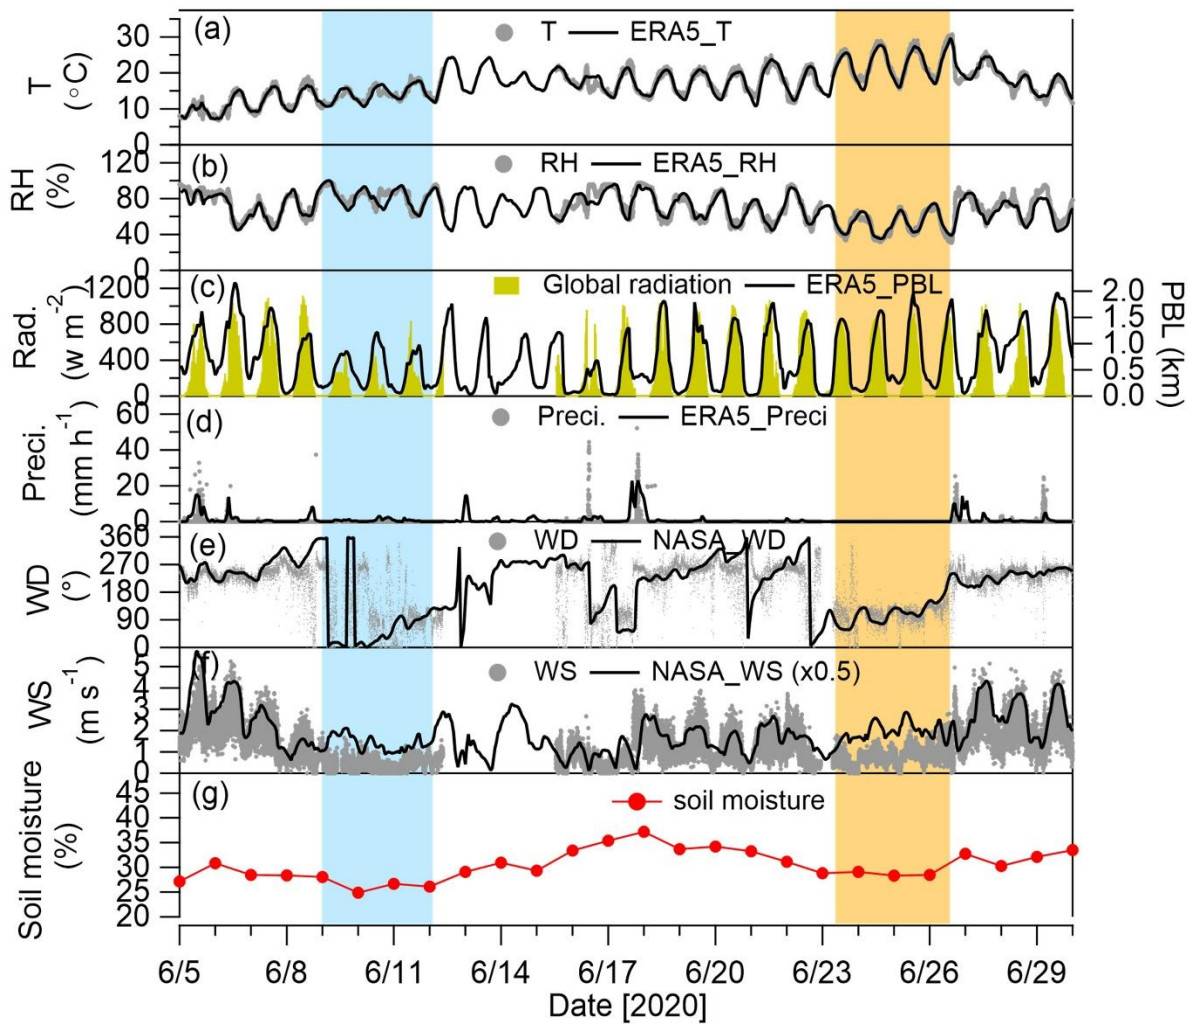

123

124 **Figure S4.** Time series of meteorological data measured by the WS700 sensor and hourly data of  
 125 temperature (T), relative humidity (RH), precipitation (Preci.) and planetary boundary layer (PBL)  
 126 height obtained from ERA5 reanalysis and hourly data of wind direction and speed (WD and WS)  
 127 obtained from NASA Power Data Access Viewer. The blue and yellow shaded areas mark low-T  
 128 and high-T episodes. (g) The daily soil moisture measured by a cosmic ray neutron sensor which  
 129 was located ~ 150 m southwest of the sampling site.

130

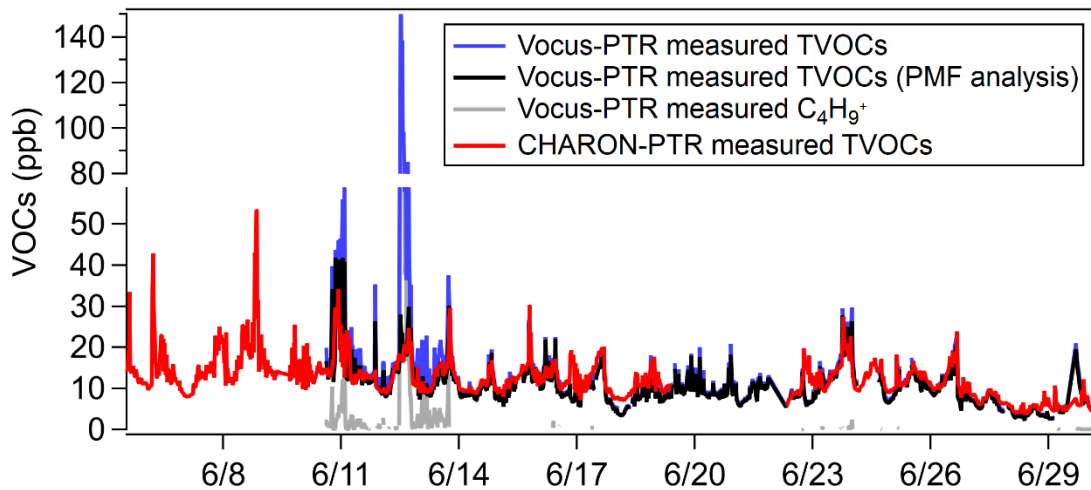

131  
132 **Figure S5.** Time series of all VOCs (blue), 157 VOCs ions for the PMF analysis (black) and  $C_4H_9^+$   
133 that measured by the Vocus-PTR-ToF-MS. The major VOCs measured by the CHARON-PTR-  
134 ToF-MS (red) was shown for the comparison.

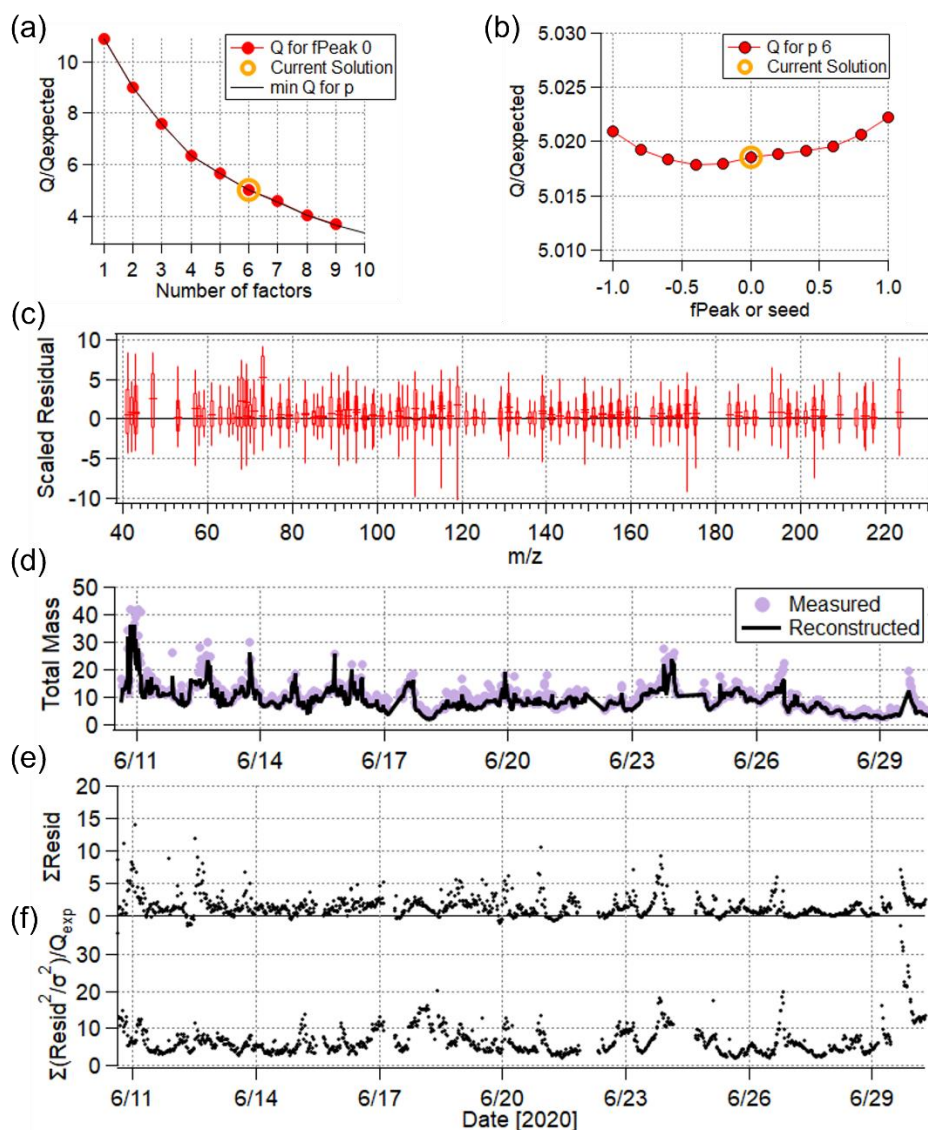

135  
 136 **Figure S6.** A summary of diagnostic plots for the PMF analysis of Vocus-PTR-ToF-MS mass  
 137 spectral data: (a)  $Q/Q_{exp}$  as a function of number of factors; (b)  $Q/Q_{exp}$  as a function of  $f_{peak}$  or seed  
 138 values; (c) scaled residual for each VOC ion; (d) comparison of measured and PMF reconstructed  
 139 mass; (e-f) time series of residual and  $Q/Q_{exp}$  values.



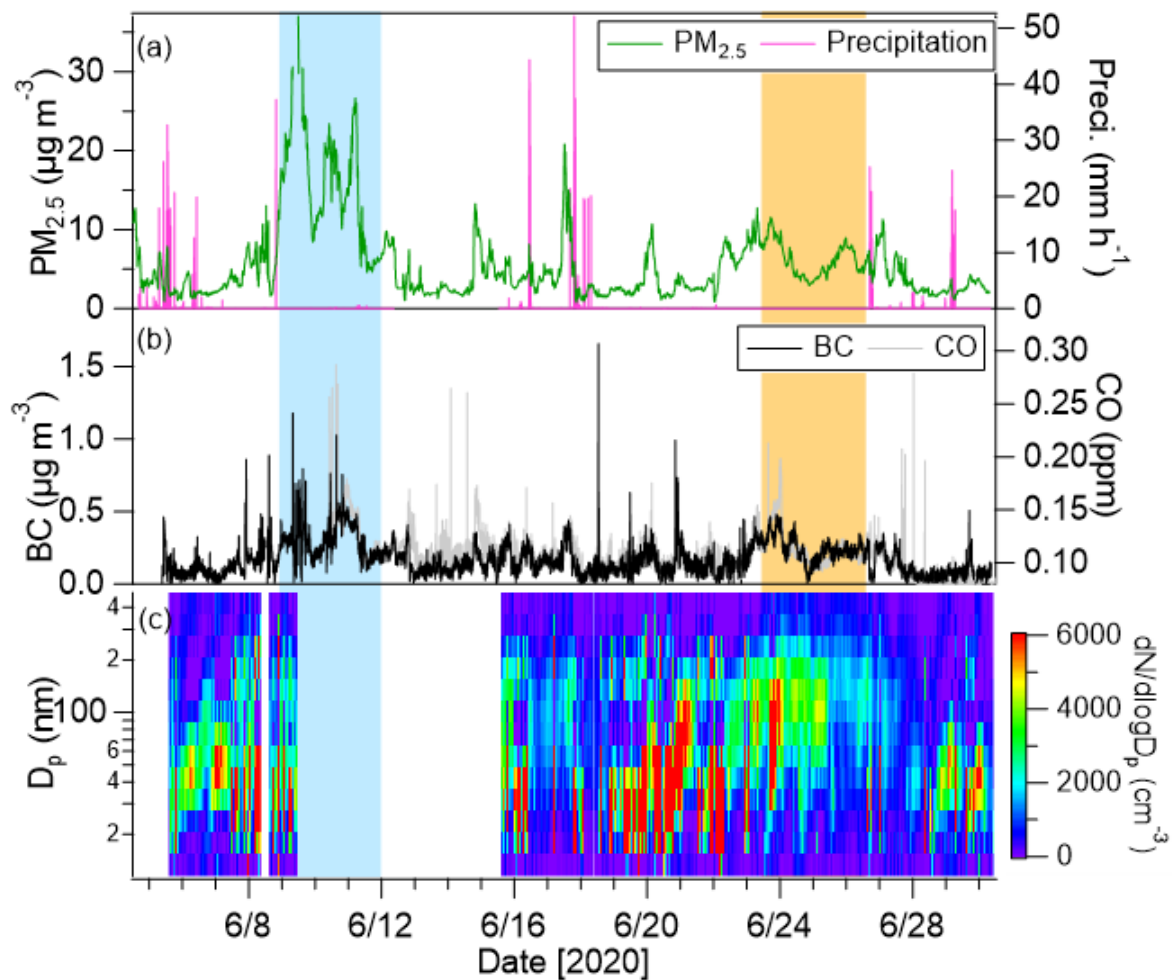

140  
 141 **Figure S7.** Time series of (a)  $\text{PM}_{2.5}$  mass concentrations and precipitation, (b) BC mass  
 142 concentrations and CO. (c) particle number size distributions measured by the NanoScan SMPS.  
 143 The blue and yellow shaded areas mark low-T and high-T episodes.

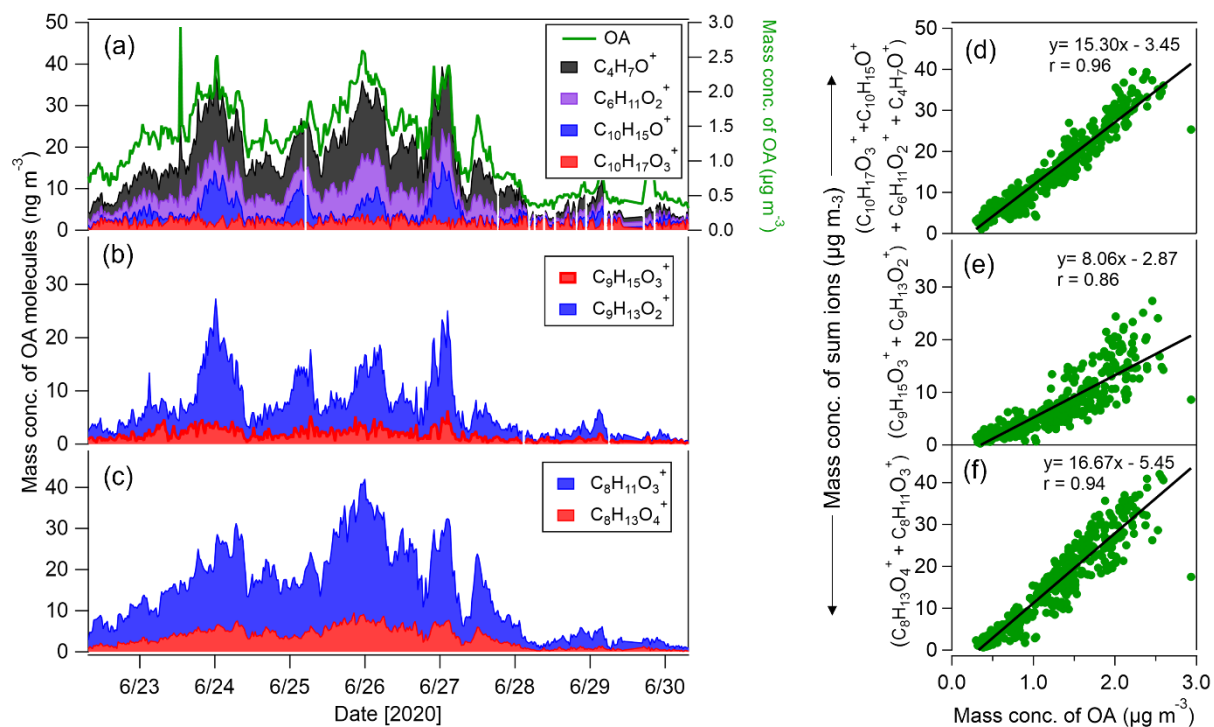

144  
 145 **Figure S8.** Time series of mass concentrations of organic aerosol (OA) and parent organic  
 146 molecules and its fragment ions from monoterpene oxidation measured by the CHARON-PTR-  
 147 ToF-MS: (a)  $\text{C}_{10}\text{H}_{17}\text{O}_3^+$  (*cis*-pinonic acid); (b)  $\text{C}_9\text{H}_{15}\text{O}_3^+$  (norpinonic acid and its isomers) (c)  
 148  $\text{C}_8\text{H}_{13}\text{O}_4^+$  (norpinic acid and its isomers). (d-f) scatter plots of OA vs. *cis*-pinonic acid, norpinonic  
 149 acid and norpinic acid respectively. The mass concentrations of *cis*-pinonic acid, norpinonic acid  
 150 and norpinic acid were calculated from the sum concentrations of the related ions.

151

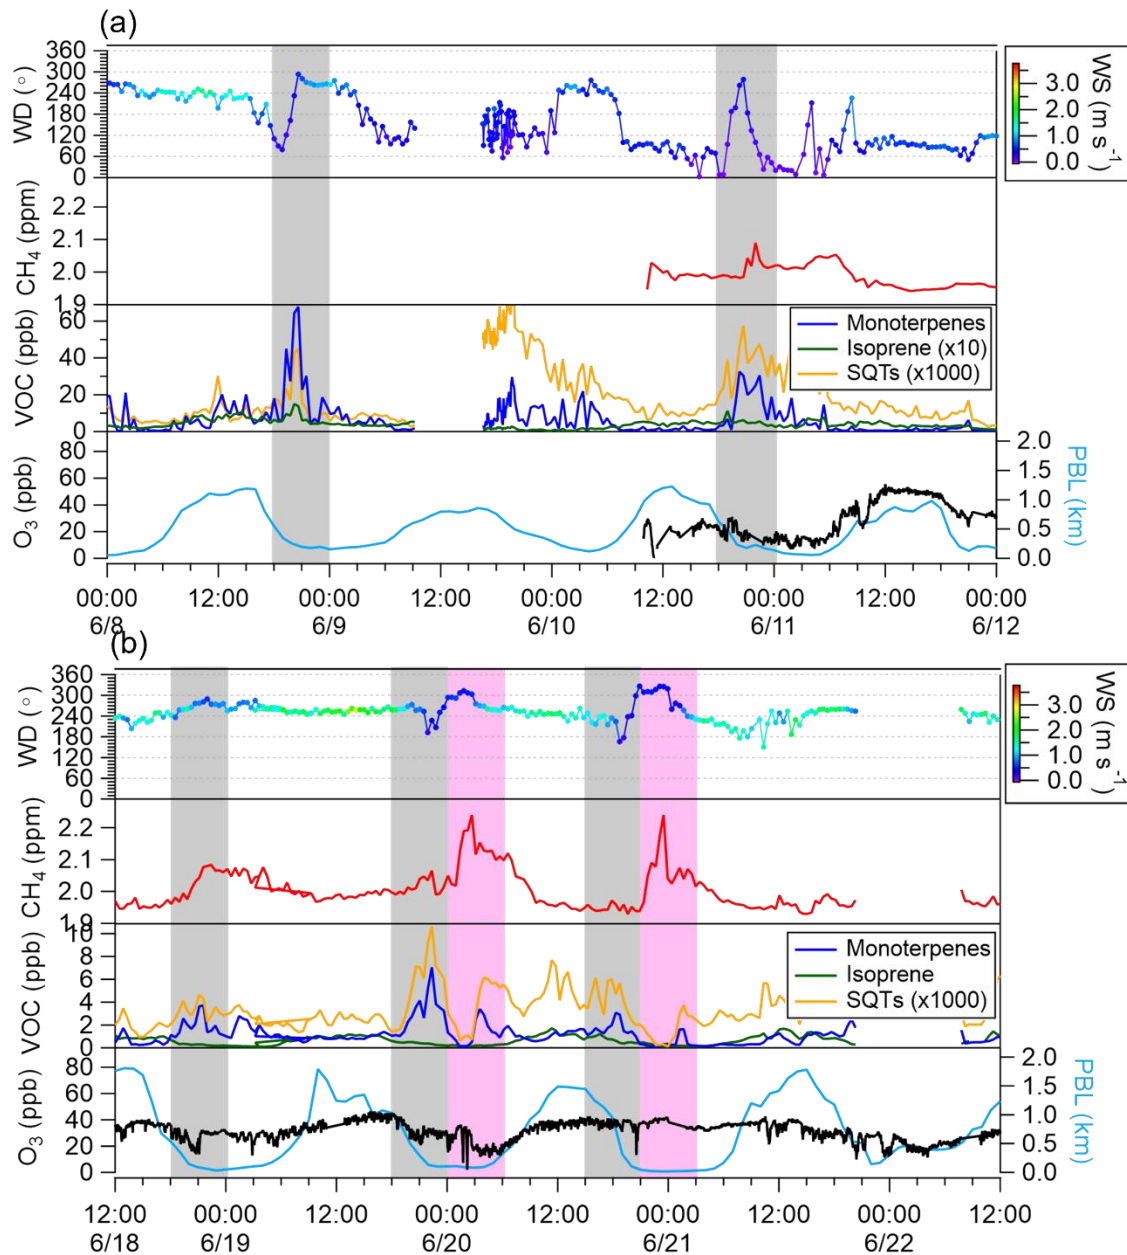

152  
 153 **Figure S9.** Time series of WD colored by the WS, CH<sub>4</sub>, isoprene, monoterpenes and sesquiterpenes,  
 154 O<sub>3</sub> concentrations and PBL heights during (a) 0:00 8<sup>th</sup> June-0:00 12<sup>th</sup> of June and (b) 12:00 18<sup>th</sup> of  
 155 June-12:00 22<sup>nd</sup> of June. The grey and pink shaded areas are marked for the cases with rapid  
 156 increases of CH<sub>4</sub> and monoterpene concentrations respectively.

157

158

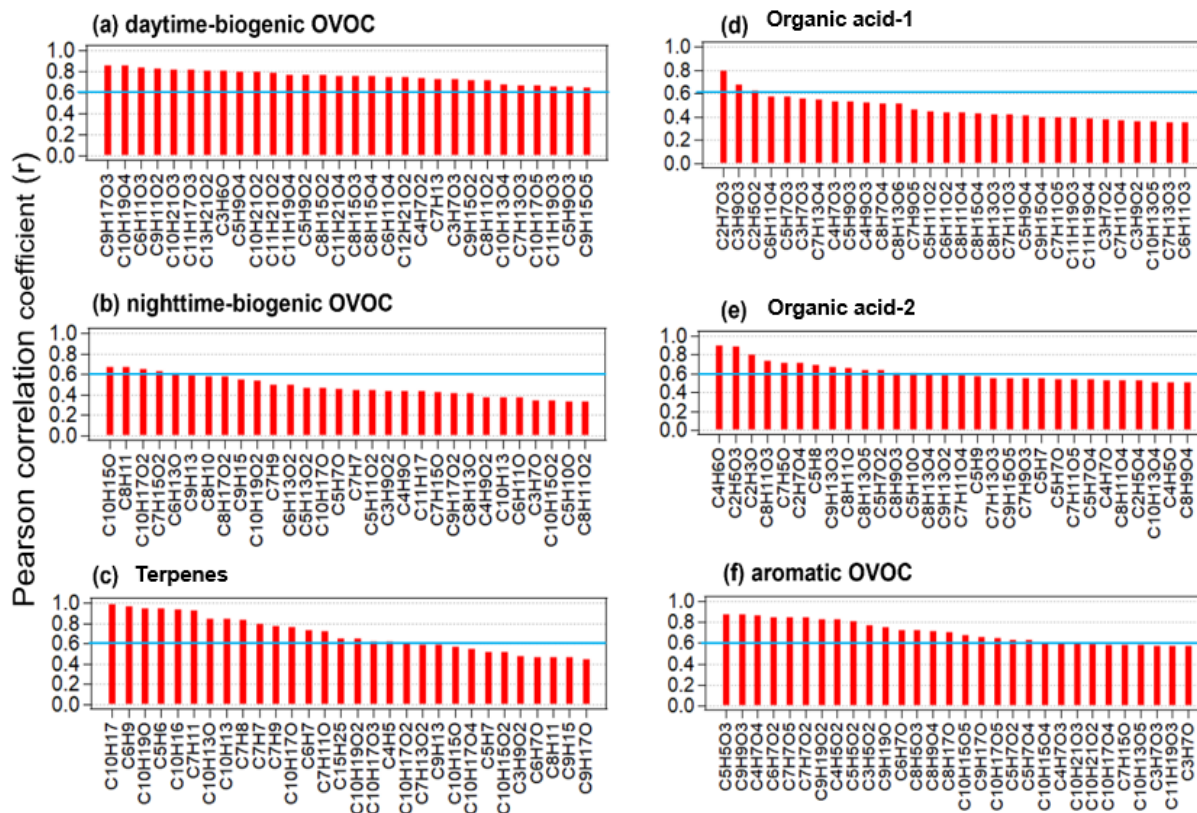

159  
 160 **Figure S10.** Results of the correlation analysis of six VOC factors resolved from the PMF analysis  
 161 of Vocus-PTR-ToF-MS mass spectral data with all VOC ions sorting by correlation coefficient.  
 162 The blue lines mark at  $r = 0.6$  to indicate relatively good correlations.

163  
 164

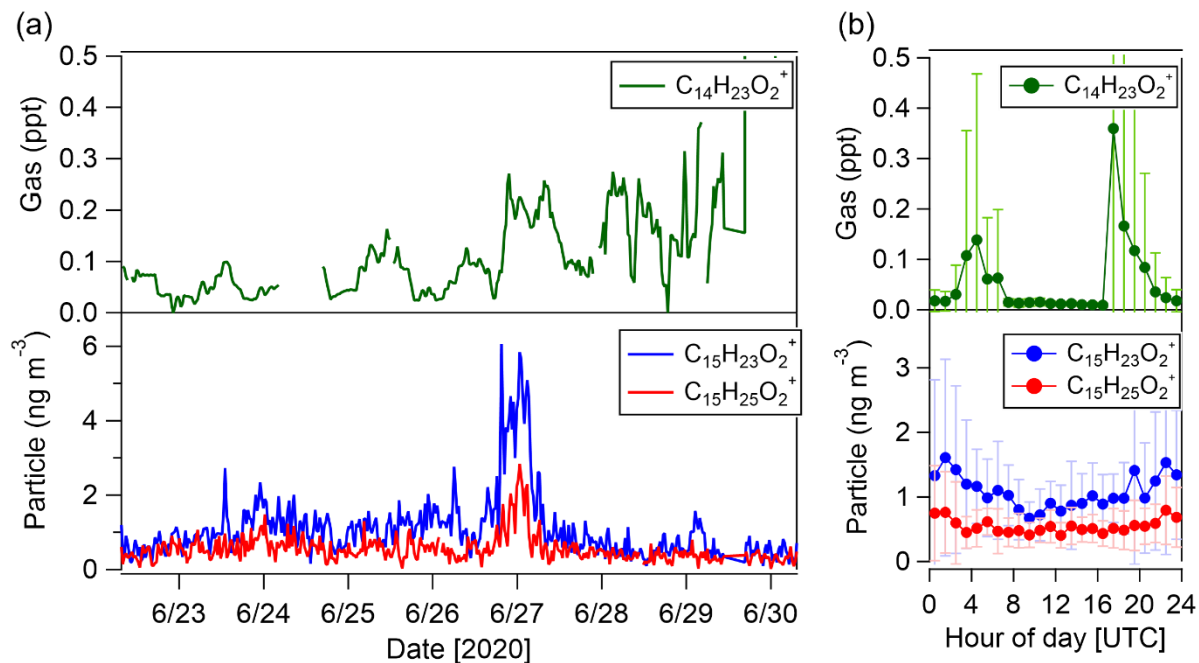

165  
 166 **Figure S11.** Time series of sesquiterpene oxidation products (a)  $C_{14}H_{23}O_2^+$  in gas phase measured  
 167 by the Vocus-PTR-ToF-MS and  $C_{15}H_{23}O_2^+$  and  $C_{15}H_{25}O_2^+$  in particle phase measured by the  
 168 CHARON-PTR-ToF-MS, and (b) their diurnal variations.

169  
 170  
 171  
 172  
 173  
 174

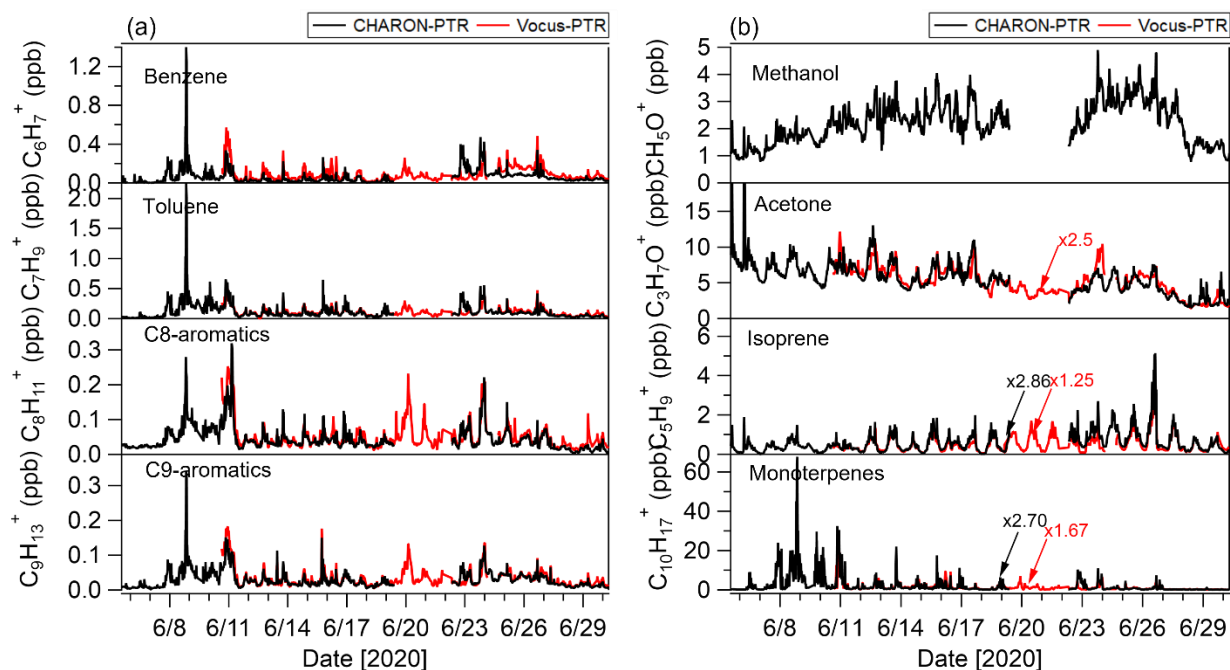

175  
 176 **Figure S12.** Comparisons of VOCs measured by CHARON-PTR-ToF-MS and Vocus-PTR-ToF-  
 177 MS: (a) aromatic hydrocarbons, (b) methanol, acetone, isoprene and monoterpenes. The data of  
 178  $C_5H_9^+$  and  $C_{10}H_{17}^+$  were scaled to obtain the concentrations of isoprene and monoterpenes based  
 179 on their fragmentation patterns in CHARON-PTR-ToF-MS and Vocus-PTR-ToF-MS.

180

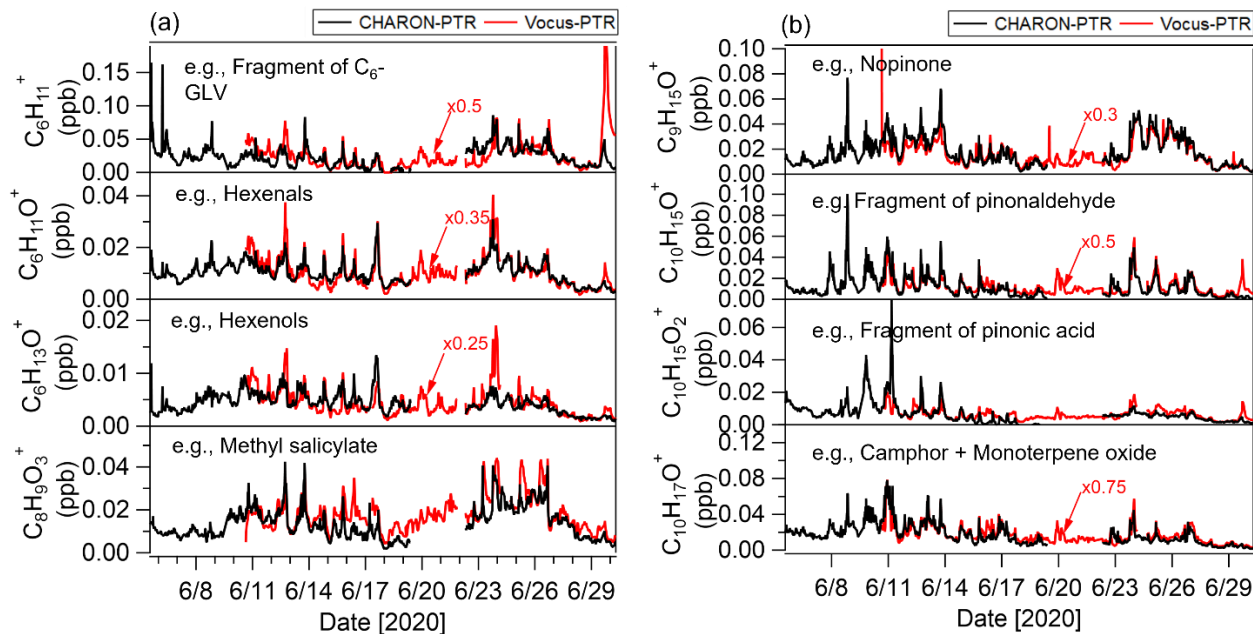

181  
 182 **Figure S13.** Comparisons of VOCs measured by CHARON-PTR-ToF-MS and Vocus-PTR-ToF-  
 183 MS: (a) VOC ions related to green leaf volatiles (GLV), (b) VOC ions related to monoterpene  
 184 oxidation products. The Vocus-PTR-ToF-MS data was scaled for comparison.

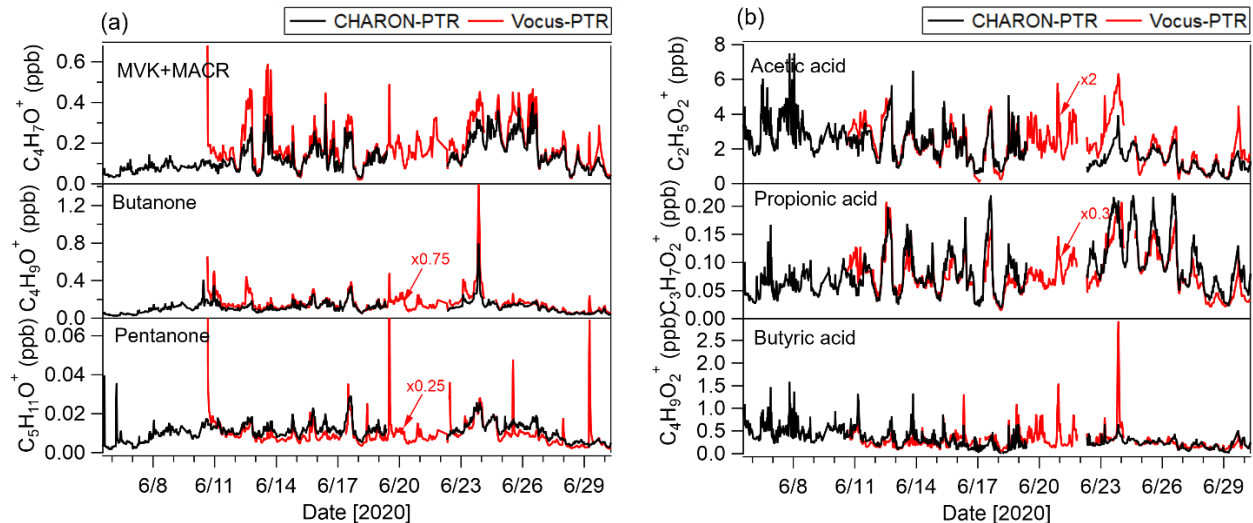

185  
 186 **Figure S14.** Comparisons of VOCs measured by CHARON-PTR-ToF-MS and Vocus-PTR-ToF-  
 187 MS: (a) ketones including methyl vinyl ketone + methacrolein (MVK+MACR), butanone,  
 188 pentanone and (b) acids including acetic acid, propionic acid, butyric acid. The Vocus-PTR-ToF-  
 189 MS data was scaled for comparison.

190

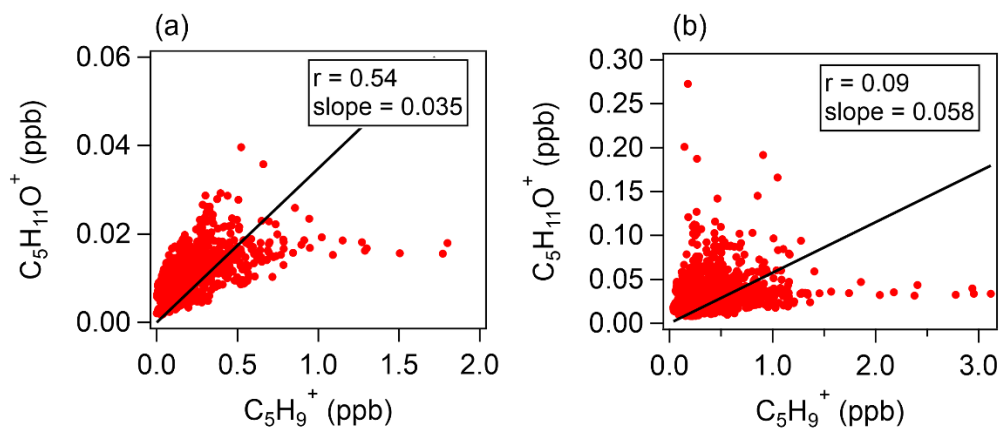

191  
192 **Figure S15.** Correlation between gaseous  $C_5H_{11}O^+$  and  $C_5H_9^+$  measured by (a) CHARON-PTR-  
193 ToF-MS and (b) Vocus-PTR-ToF-MS.

194

195



196 **References**

- 197 Bosque, R. and Sales, J.: Polarizabilities of Solvents from the Chemical Composition, *Journal of*  
198 *Chemical Information and Computer Sciences*, 42, 1154-1163, 10.1021/ci025528x, 2002.
- 199 Coggon, M. M., Stockwell, C. E., Clafflin, M. S., Pfannerstill, E. Y., Lu, X., Gilman, J. B.,  
200 Marcantonio, J., Cao, C., Bates, K., Gkatzelis, G. I., Lamplugh, A., Katz, E. F., Arata, C.,  
201 Apel, E. C., Hornbrook, R. S., Piel, F., Majluf, F., Blake, D. R., Wisthaler, A., Canagaratna,  
202 M., Lerner, B. M., Goldstein, A. H., Mak, J. E., and Warneke, C.: Identifying and correcting  
203 interferences to PTR-ToF-MS measurements of isoprene and other urban volatile organic  
204 compounds, *EGUsphere*, 2023, 1-41, 10.5194/egusphere-2023-1497, 2023.
- 205 Gioumousis, G. and Stevenson, D. P.: Reactions of Gaseous Molecule Ions with Gaseous  
206 Molecules. V. Theory, *The Journal of Chemical Physics*, 29, 294-299, 10.1063/1.1744477,  
207 1958.
- 208 Karl, T., Hansel, A., Cappellin, L., Kaser, L., Herdlinger-Blatt, I., and Jud, W.: Selective  
209 measurements of isoprene and 2-methyl-3-buten-2-ol based on NO<sup>+</sup>  
210 ionization mass spectrometry, *Atmos. Chem. Phys.*, 12, 11877-11884, 10.5194/acp-12-  
211 11877-2012, 2012.
- 212 Leglise, J., Müller, M., Piel, F., Otto, T., and Wisthaler, A.: Bulk Organic Aerosol Analysis by  
213 Proton-Transfer-Reaction Mass Spectrometry: An Improved Methodology for the  
214 Determination of Total Organic Mass, O:C and H:C Elemental Ratios, and the Average  
215 Molecular Formula, *Analytical Chemistry*, 91, 12619-12624,  
216 10.1021/acs.analchem.9b02949, 2019.
- 217 Müller, M., Eichler, P., D'Anna, B., Tan, W., and Wisthaler, A.: Direct Sampling and Analysis of  
218 Atmospheric Particulate Organic Matter by Proton-Transfer-Reaction Mass Spectrometry,  
219 *Analytical Chemistry*, 89, 10889-10897, 10.1021/acs.analchem.7b02582, 2017.
- 220 Pfannerstill, E. Y., Arata, C., Zhu, Q., Schulze, B. C., Woods, R., Seinfeld, J. H., Bucholtz, A.,  
221 Cohen, R. C., and Goldstein, A. H.: Volatile organic compound fluxes in the agricultural  
222 San Joaquin Valley – spatial distribution, source attribution, and inventory comparison,  
223 *Atmos. Chem. Phys.*, 23, 12753-12780, 10.5194/acp-23-12753-2023, 2023.
- 224 Piel, F., Müller, M., Winkler, K., Skytte af Sättra, J., and Wisthaler, A.: Introducing the extended  
225 volatility range proton-transfer-reaction mass spectrometer (EVR PTR-MS), *Atmos. Meas.*  
226 *Tech.*, 14, 1355-1363, 10.5194/amt-14-1355-2021, 2021.
- 227 Su, T. and Chesnavich, W. J.: Parametrization of the ion–polar molecule collision rate constant by  
228 trajectory calculations, *The Journal of Chemical Physics*, 76, 5183-5185, 10.1063/1.442828,  
229 1982.
- 230 Yuan, B., Koss, A. R., Warneke, C., Coggon, M., Sekimoto, K., and de Gouw, J. A.: Proton-  
231 Transfer-Reaction Mass Spectrometry: Applications in Atmospheric Sciences, *Chemical*  
232 *Reviews*, 117, 13187-13229, 10.1021/acs.chemrev.7b00325, 2017.

233
